1 **Satellite glial cells modulate cholinergic transmission**  
2 **between sympathetic neurons**

3

4 Joana Enes, Surbhi Sona, Nega Gerard, Alexander C. Mitchell, Marian Haburcak  
5 and Susan J. Birren \*

6 Department of Biology, Volen National Center for Complex Systems, Brandeis  
7 University, Waltham, MA, U.S.A.

8

9 \* Corresponding author

10 E-mail: [birren@brandeis.edu](mailto:birren@brandeis.edu)

11 Phone: 781-736-2680

12

13 Short title:

14 “Satellite glial regulation of sympathetic activity”

15

16

17

18

## 19 **Abstract**

20           Postganglionic sympathetic neurons and satellite glial cells are the two major  
21 cell types of the peripheral sympathetic ganglia. Sympathetic neurons project to and  
22 provide neural control of peripheral organs and have been implicated in human  
23 disorders ranging from cardiovascular disease to peripheral neuropathies. Here we  
24 show that satellite glia regulate postnatal development and activity of sympathetic  
25 neurons, providing evidence for local ganglionic control of sympathetic drive. We  
26 show changes in the cellular architecture of the rat sympathetic ganglia during the  
27 postnatal period, with satellite glia enwrapping sympathetic neuronal somata during  
28 a period of neuronal hypertrophy. In culture, satellite glia contribute to neuronal  
29 survival, promote synapse formation and play a modulatory role in neuron-to-  
30 neuron cholinergic neurotransmission, consistent with the close contact seen within  
31 the ganglia. Cultured satellite glia make and release neurotrophins, which can  
32 partially rescue the neurons from nerve growth factor deprivation.  
33 Electrophysiological recordings and immunocytochemical analysis on cultured  
34 sympathetic neurons show that satellite glial cells influence synapse number and  
35 total neuronal activity with little effect on neuronal intrinsic excitability. Thus,  
36 satellite glia play an early and ongoing role within the postnatal sympathetic ganglia,  
37 expanding our understanding of the contributions of local and target-derived factors  
38 in the regulation of sympathetic neuron function.

39

## 40 **Introduction**

41           Glial cells, once thought of as neuron support cells, are now recognized as  
42 active players in the formation and function of normal brain circuitry [1, 2].  
43 Astrocytes, the most abundant glial cell type in the brain, regulate many properties  
44 of neuronal circuits such as neuronal excitability, synaptic transmission and  
45 plasticity [3-5]. Their role at central nervous system (CNS) synapses has been the  
46 focus of a number of studies in the past two decades, showing that astrocytes control  
47 the formation [6-8], maturation [9], function [10, 11] and refinement [12] of  
48 synapses. These functions are mediated by various secreted as well as contact-  
49 dependent signals [11, 13, 14]. In addition to their role in the development and  
50 function of neuronal circuits [15], glia also play an important role in neurological  
51 disease, with astrocytes responding and contributing to human conditions ranging  
52 from developmental to degenerative disorders and traumatic lesions [16, 17].

53           In contrast to the wealth of information available on the roles of CNS  
54 astroglia, we have only a limited understanding of the satellite glia found in  
55 peripheral ganglia. This is particularly true for the sympathetic nervous system,  
56 which innervates most internal organs and regulates their function. A basal level of  
57 sympathetic activity, or sympathetic tone, together with opposing activity from the  
58 parasympathetic nervous system, ensures constant bodily homeostasis. Sympathetic  
59 tone may rise on a short timescale in response to a physiological demand (for  
60 example, exercise or stress) [18, 19], or over a long timescale, in a sustained manner,

61 under pathological conditions such as hypertension and chronic heart disease [20,  
62 21]. Sympathetic tone is initially set by neurons present in the brain and spinal cord  
63 [22], with the sympathetic ganglionic neurons acting as the final regulatory element  
64 determining the output of the sympathetic circuit.

65 A striking anatomical feature of the sympathetic ganglion is the presence of  
66 satellite glia that form an envelope around individual ganglionic neuronal somata  
67 and cover synapses [23]. This is in contrast to the CNS where individual astrocytes  
68 are in contact with multiple neurons [24]. While the function of the satellite glia  
69 remains to be fully defined, both sympathetic and sensory satellite glia share several  
70 cellular and molecular features with astrocytes, including expression of  
71 neurotransmitter receptors and the formation of a glia network via gap junctions  
72 [25]. Satellite glia injury responses are characterized by changes in expression  
73 profiles, including an up-regulation of the activation marker glial fibrillary acidic  
74 protein (GFAP) [26]. These findings point to a possible effect in disease progression  
75 and suggest that satellite glia play roles in both normal function and disease in the  
76 peripheral nervous system.

77 Recent studies using genetic manipulations of sympathetic satellite glia have  
78 implicated these cells in the regulation of target organ function by demonstrating  
79 that selective activation of Gq-GPCR (G protein-coupled receptor) signaling in  
80 peripheral glia leads to the modulation of cardiac properties in adult mice [27, 28].  
81 These effects are mediated through postganglionic sympathetic innervation of the  
82 heart raising the possibility that activated glia influence the active properties of

83 sympathetic neurons within the ganglia. This idea is supported by the finding that  
84 ganglionic cells can alter the short-term plasticity of single sympathetic neurons  
85 cultured in isolated conditions [29]. Less is known however, of the effects of  
86 satellite glia on the formation and function of cholinergic synapses in the  
87 sympathetic system.

88         Developmentally, reciprocal interactions between embryonic sympathetic  
89 neurons and presumptive glial progenitors in the local ganglionic environment have  
90 been shown to promote co-differentiation of both cell types at early development  
91 times [30]. Work showing that non-neuronal ganglionic cells support the early  
92 development of dendrites [31] and transiently regulate the expression of potassium  
93 currents during the perinatal period [32, 33] suggests that satellite glial cells in the  
94 sympathetic ganglia might also regulate the emergence of mature neuronal  
95 properties of sympathetic neurons. Thus, neuron-glia interactions in the  
96 sympathetic ganglia may be established early and regulate multiple properties of  
97 sympathetic neurons during the establishment of the sympathetic circuits.

98         Here we show that satellite glia surround sympathetic neurons within the  
99 postnatal sympathetic ganglion during a period of neuronal maturation. We explore  
100 the influence of these glia on sympathetic neuron survival and synaptic development  
101 during the neonatal period. We find that satellite glia promote the survival of  
102 cultured sympathetic neuron via a nerve growth factor (NGF)-dependent  
103 mechanism, suggesting glia contributions to neuron survival that are independent of  
104 known target-dependent survival pathways. Co-cultured glia also increase

105 sympathetic cholinergic synaptic activity via a mechanism that involves secreted  
106 factors and regulation of the number of synaptic sites. These experiments provide  
107 insight into the development and modulation of sympathetic tone at the sympathetic-  
108 cardiac circuit's last neuron-to-neuron synapse (see Fig 1).

109 **Fig 1. Schematic of the peripheral sympathetic-cardiac circuit.** Within the  
110 sympathetic ganglia, pre-synaptic inputs from spinal cord preganglionic neurons  
111 form cholinergic synapses onto postganglionic sympathetic neurons, and satellite  
112 glial cells in the ganglia enwrap neuronal soma. The postganglionic neurons project  
113 to peripheral targets including the heart.

114

## 116 **Materials and methods**

117 **Cell culture.** All experimental procedures involving animals were approved by the  
118 Brandeis Institutional Animal Care and Use Committee. Superior cervical  
119 sympathetic ganglia (SCG) were dissected from P1-P3 Sprague-Dawley rats unless  
120 otherwise stated, de-sheathed, and incubated at 37° C for 1 hour in minimum  
121 essential medium (Gibco BRL, Invitrogen, Carlsbad, CA, USA) containing 350  
122 units/ml collagenase type I (Worthington Biochemical Corporation, Lakewood, NJ,  
123 USA) and 5.5 units/ml dispase (Gibco BRL, Invitrogen, Carlsbad, CA, USA).  
124 Following enzymatic digestion, the cells were dissociated by passing repeatedly  
125 through fire-polished glass pipettes, and pre-plated on uncoated plastic tissue culture  
126 dishes for 1 hour at 37° C to remove non-neuronal flat cells. The less adherent cells,  
127 which consisted of aggregates of neurons and satellite glia, were then rinsed off the  
128 dishes, and plated at a density of 10,000 cells per dish on glass-bottomed plates  
129 (MatTek Corporation, Ashland, MA, USA) coated with collagen (50 µg/ml; BD  
130 Biosciences, Bedford, MA, USA) and mouse laminin (5 µg /ml; BD Biosciences,  
131 Bedford, MA). Cultures were maintained in modified L15CO<sub>2</sub> medium (Hawrot and  
132 Patterson, 1979; Lockhart et al., 1997), supplemented with 10% fetal bovine serum  
133 (Omega Scientific, Tarzana, CA, USA), 6 µg/ml dextrose, 2 mM glutamine  
134 (Invitrogen, Carlsbad, CA, USA), 100 U/ml penicillin & 100 µg/ml streptomycin  
135 (Invitrogen, Carlsbad, CA, USA), 1 µg/ml 6,7, dimethyl-5,6,7,8-tetrahydropterine  
136 (DMPH4, Calbiochem, San Diego, CA, USA), 5 µg/ml glutathione (Sigma, St.

137 Louis, MO, USA) and 100 µg/ml L-ascorbic acid. Mouse 2.5S NGF (5 ng/ml, BD  
138 Biosciences) was added to all cultures, unless stated, to support neuronal survival.  
139 Half of the media was exchanged with fresh NGF-containing growth medium three  
140 times weekly. To obtain glia-free neuronal cultures, cytosine arabinofuranoside  
141 (AraC, 1 µM, Sigma, St. Louis, MO, USA) was added to the cell culture media from  
142 day 1 to day 3 to inhibit glia cell division. To obtain neuron-glia co-cultures, AraC  
143 was withheld from the media and satellite glial cells proliferated rapidly, reaching  
144 100% confluency at around 7-10 div (days in vitro). In some experiments we first  
145 used AraC to obtain glia-free neuron-alone cultures and satellite glial cells were re-  
146 plated on top of the neurons after 7 day of culture at approximately 100,000 glial  
147 cells per dish (NG[7]). These glia also formed a confluent layer by 10-14 div. Under  
148 all of these culture conditions, about 95% of the non-neuronal cells stained positive  
149 for S100β, a glial-cell marker. For NGF deprivation experiments, cultures were  
150 initially plated in the presence of 5 ng/ml NGF in serum-free medium, which was  
151 replaced after two days with NGF-free, serum-free medium. NGF-free cultures were  
152 treated with anti-NGF antibody (1:1000, final concentration 1 µg/ml), or K252  
153 (1:20000, final concentration 100 nM).

154

155 **Immunohistochemistry.** Wistar Kyoto (WKY) rats were euthanized by CO<sub>2</sub>  
156 asphyxiation and SCG were dissected. The tissues were fixed for at least overnight  
157 in 4% paraformaldehyde (PFA) and then cryo-protected by incubating them in 30%



158 sucrose solution at 4°C until the tissues sank. The tissues were placed in cryo-molds  
159 and embedded in O.C.T. (optimal cutting temperature) compound (Tissue-Tek  
160 O.C.T. Compound, Sakura Finetek, VWR, CA, USA) before freezing with dry ice.  
161 The tissues were cut into 10 µm, longitudinal sections in a cryostat (Leica CM3050,  
162 Buffalo Grove, IL, USA) and thaw mounted onto Fisherbrand™ ColorFrost™ Plus  
163 Microscope Slides.

164 The tissue sections were rehydrated in PBS before treatment with 10 mg/ml  
165 sodium borohydride solution and then incubated in 3% bovine serum albumin  
166 (BSA)/0.3% Triton X-100 solution for 1 hour. They were then incubated overnight  
167 with primary antibodies at the following concentrations: chicken anti-Microtubule  
168 Associated Protein 2 (MAP2) polyclonal antibody (Sigma-Aldrich, EMD Millipore,  
169 Darmstadt, Germany, AB5543, 1:1000) and rabbit anti-S100 calcium-binding  
170 protein B β-subunit (S100-β) polyclonal antibody (Agilent Dako, Santa Clara, CA,  
171 USA Z0311, 1:400). Following washing, they were incubated with donkey anti-  
172 chicken rhodamine and donkey anti-rabbit Alexa 488 secondary antibodies for 1.5  
173 hours and then with 1 mg/ml 4',6-diamidino-2-phenylindole (DAPI, Invitrogen Life  
174 Technologies) (1:20) for 15 mins. Subsequently, the slides were immersed briefly  
175 in distilled H<sub>2</sub>O and then mounted using 1:1 glycerol:PBS mounting solution. The  
176 sections were then imaged using the Zen software (Zeiss) on a Zeiss LSM 880 laser  
177 scanning confocal microscope.

178

179 **Cell density and morphology quantification.** Three SCG sections per animal

180 and 2-4 images per section were taken using the 561 nm, 488 nm and 405 nm lasers  
181 to excite the three fluorochromes: rhodamine, Alexa 488, and DAPI, respectively.  
182 Neurons in SCG sections were identified by MAP2 staining, glial cells by S100 $\beta$   
183 staining, and nuclei by DAPI staining. The number of neurons was counted using  
184 the Cell Counter plug-in of the Fiji (SciJava Consortium) software. Cells stained for  
185 both S100 $\beta$  and DAPI were identified as glial cells and the number of glial cells was  
186 calculated. The neuron soma size was measured by manually outlining MAP-2  
187 stained neurons within a rectangular area of identical size and position in each  
188 image using Fiji software in sections stained for MAP2, S100 $\beta$  and DAPI.

189

190 **Electrophysiology.** Neuronal whole-cell patch-clamp recordings were made  
191 using an Axopatch 200B amplifier (Axon Instruments, Union City, CA, USA).  
192 Extracellular solution contained, in mM: NaCl 150, KCl 3, MgCl<sub>2</sub> 2, HEPES 10,  
193 CaCl<sub>2</sub> 2 and D-glucose 11; pH 7.4 and adjusted to 320 mOsm with sucrose. Patch  
194 pipettes had resistances of 2-4 M $\Omega$  and were filled with internal solution containing,  
195 in mM: K gluconate 100, KCl 30, MgSO<sub>4</sub> 1, EGTA 0.5, HEPES 10, K<sub>2</sub>ATP 2,  
196 NaGTP 0.3, Tris phosphocreatine 10; pH 7.2 and adjusted to 290 mOsmol with  
197 sucrose. All recordings were made at 33-35° C using a QE-1 heated culture dish  
198 platform (Warner Instruments Inc., Hamden, CT, USA). Data were acquired with  
199 pClamp 8 software suite and digitized at 10 kHz and low-pass filtered at 2 kHz.  
200 Electrophysiological responses were analyzed using built-in functions in MatLab  
201 (The MathWorks, Inc.).

202 Spontaneous activity was recorded for 5 minutes at a holding potential of -  
203 60 mV; cells were classified as silent if they showed fewer than 10 single events in  
204 the 5 min period. Total synaptic charge was defined as the area above the curve, i.e.  
205 the sum of all the current values above a threshold of 25 pA. Average synaptic  
206 charge corresponds to values calculated per 10 s duration. Values presented in plots  
207 are average membrane currents quantified as averaged synaptic charge normalized  
208 to 1 ms duration. Due to incomplete voltage clamp, we occasionally found cells that  
209 showed escaping action potentials identifiable based on an amplitude  $> 1$  nA and  
210 duration  $< 7.5$  ms. Those spikes were excluded from the quantification by cutting  
211 them off from the original trace and replacing them by interpolated values. Series  
212 resistance ( $R_s$ ) was monitored throughout recordings but not compensated. Cells  
213 were accepted for analysis only if they met the following criteria: a) resting  $V_m < -$   
214 45 mV, b)  $R_{series} < 20$  M $\Omega$ , c)  $R_{input} > 100$  M $\Omega$  and not varying more than 20% of  
215 the initial value over the course of the recording.

216 Evoked activity was recorded in normal extracellular solution containing the  
217 nicotinic cholinergic antagonist hexamethonium bromide (100  $\mu$ M; Sigma, St.  
218 Louis, MO, USA). A small dc current was injected to maintain membrane potential  
219 at -60 mV in between depolarizations. To examine the firing properties, incremental  
220 current pulses of 500 ms duration were injected into the cell. The average cell  
221 response was calculated from 3 consecutive trials.

222

223 **Immunocytochemistry.** Cultured cells were fixed with 4% paraformaldehyde  
224 and stained for  $\beta$ -tubulin class III with ms anti-Tuj-1 antibody (Covance; 1:2000),  
225 for the glial cell marker S100 $\beta$  with rb anti-S100 (Agilent Dako; 1:1000) and for  
226 nuclei with DAPI (4',6-Diamidino-2-Phenylindole Dihydrochloride;  
227 Invitrogen; 1:500). The antigen-antibody complex was visualized using the  
228 secondary antibodies dk anti-ms Rhodamine (1:500) and dk anti-rb FITC (1:500).  
229 Synaptic puncta were identified by the co-localization of pre-synaptic Vesicular  
230 Acetylcholine Transporter (VACHT) protein and the post-synaptic Shank protein in  
231 MAP2 stained neurons using rb anti-VACHT (Sigma Aldrich; 1:1000), ms anti-  
232 shank (Neuromab; 1:200) and ck anti-MAP2 (Chemicon, 1:1000) primary  
233 antibodies in conjugation with 1:500 diluted gt anti-rb Alexa 647, gt anti-ms Alexa  
234 488 and gt anti-ck Alexa 568 secondary antibodies (Invitrogen).

235

236 **Synapse quantification.** Sixteen bit images of 15-30 isolated neurons across 2  
237 coverslips per condition from 3 independent cultures were acquired using a Leica  
238 DM6000 Confocal microscope under a 63x oil objective at zoom 3 and 1024x1024  
239 resolution. Images were acquired sequentially under identical settings of laser  
240 strength, detector gain and detector offset across all conditions within each culture.  
241 These settings were chosen to exclude signal saturation in each channel using Quick  
242 Lookup Tables (QLUT) available in the Leica image acquisition software. The  
243 maximum intensity projection of each image was then analyzed using Puncta

244 Analyzer (an ImageJ plugin written by Barry Wark and available upon request from  
245 c.eroglu@cellbio.duke.edu). The number and size of synaptic puncta on SCG  
246 neuronal cell bodies and proximal dendrites (<50  $\mu\text{m}$ ) were quantified using  
247 identical threshold values for all cells in both conditions. The number of synaptic  
248 puncta was normalized to the MAP2-positive area. Size of synaptic puncta was  
249 calculated by the ImageJ plugin.

250

251 **Preparation of glial cell-conditioned medium (GCM) and control**  
252 **medium (C).** Ganglion cells were grown in serum- and NGF- containing media  
253 until confluence, about 7-9 days. The cells were then trypsinized and transferred to  
254 new 10 cm dishes. After 20 minutes, cells were washed 3 times with warm PBS to  
255 remove neurons, and cultured in serum-free NGF-free medium for 3 additional days.  
256 This glial cell-conditioned medium (GCM) was collected, centrifuged for 3 min to  
257 pellet cell debris, and concentrated using centrifugal concentrators (Sartorius) with  
258 a size cut-off filter of 5 kDa. By centrifuging at 1750xg for 90 minutes, GCM was  
259 concentrated to about 20x. GCM was then filtered through a 0.22  $\mu\text{m}$  syringe filter  
260 and stored at  $-20^{\circ}\text{C}$ . It was added to the cells at 1:3 ratio in fresh serum-containing  
261 media (final serum concentration of 7.5%). Control, unconditioned media (C) was  
262 prepared by concentrating approximately 20x serum-free media using the same  
263 centrifugal concentrators, and added to the cells at a 1:3 ratio in fresh serum-  
264 containing media (final serum concentration is also 7.5%).

265

266 **Western blotting.** Cultured glial cells were lysed in RIPA buffer, and protein  
267 concentration in the lysate was determined using the Bradford Assay. SDS-PAGE  
268 was performed using 20 µg of each sample. The proteins were then transferred to  
269 polyvinylidene fluoride (PVDF) membrane (0.2 µm, Bio-Rad). The membrane was  
270 blocked for 1 h at room temperature using 10% non-fat dry milk in PBS, incubated  
271 with the appropriate primary antibody for 2 hours at room temperature: rb-NGF  
272 (1:500; Santa Cruz #sc-548), rb-BDNF (1:500; Santa Cruz #sc-546) or rb-actin  
273 (1:7500; Odyssey # 92642210), washed and then incubated with the respective  
274 secondary antibody (gt anti-m HRP (1:7500; Jackson ImmunoResearch  
275 #111035144) or gt anti-rb HRP (1:7500; Jackson ImmunoResearch #111035144)  
276 for 1 hour at room temperature. Both primary and secondary antibodies were diluted  
277 in 1% PBST. Blots were developed using LumiGLO Chemiluminescent Substrate  
278 (KPL# 546100) on Blue Devil X-ray Films (Genesee Scientific #30-100). To test  
279 for specificity of the antibodies, 95% confluent HEK cells were transfected either  
280 with empty (-), NGF-expressing (NGF) or BDNF-expressing (BDNF) plasmids.  
281 The NGF and BDNF constructs were cloned into promoter based SR $\alpha$ -based  
282 expression vector pBJ-5 [34, 35] and kindly provided by Masami Kojima (National  
283 Institute of Advanced Industrial Science and Technology, AIST Kansai, Osaka,  
284 Japan).

285

286 **Statistics.** Data from at least 3 independent sets of cell culture experiments and at  
287 least three animals for immunohistochemistry were pooled for analysis. Results are  
288 presented as mean  $\pm$  s.e.m.; for cell culture experiments n represents the number of  
289 neurons analyzed; for immunohistochemistry n represents number of animals.  
290 Statistical analysis was done using SigmaStat or IBM SPSS software. t-tests or  
291 Mann-Whitney were used for comparisons. For multiple comparisons, ANOVA  
292 was used, followed by pairwise post hoc (Tukey's HSD) comparisons.  
293

## 295 **Results**

### 296 **Dynamic changes in the ganglionic structure of sympathetic neurons and** 297 **satellite glia during the postnatal period *in vivo***

298 Satellite glia within the peripheral sympathetic ganglia enwrap sympathetic  
299 neuronal cell bodies (Fig 2a-2c). This morphology can be observed in the Superior  
300 Cervical Ganglion (SCG) by postnatal day 2 (P2) (Fig 2a), a period of active  
301 sympathetic innervation of peripheral targets [36]. Over the course of the first eight  
302 postnatal weeks, sympathetic neurons increase in size (Fig 2b-d) as the neurons  
303 make target contacts and are exposed to target derived signals that promote cellular  
304 hypertrophy [37]. As neurons increase in size the number of neurons per unit area  
305 decreases, while the density of satellite glial cells remains constant over the first  
306 three postnatal weeks, with a decrease in glial density by 8 weeks (Fig 2e). This  
307 results in an increase in the number of glial cells associated with an individual  
308 neuron over the postnatal period.

309 **Fig 2. Postnatal development of neurons and satellite glia in the Superior**  
310 **Cervical Ganglion (SCG).** (a-c) Representative confocal images of (a) P2 SCG,  
311 (b) 3 week (3 wks) old and (c) 8 weeks (8 wks) old SCG. Sympathetic neurons  
312 were stained for the neuron-specific marker MAP2 (red), satellite glial cells for the  
313 glial cell marker S100 $\beta$  (green) and cell nuclei using DAPI (blue). Scale bar = 60  
314  $\mu$ m. (d-e) Quantification of (d) neuron soma size, measured as average cell area in  
315 the section and (e) neuronal and glial cell densities from sections of P2 (n=3; mean



316  $\pm$  s.e.m.), 3 wks (n=3; mean  $\pm$  s.e.m.) and 8 wks animals (n=6; mean  $\pm$  s.e.m.).  
317 \*\*\*p<0.001, \*\*p<0.01, \*p<0.05 determined by ANOVA followed by pairwise post  
318 hoc (Tukey's HSD) comparison test.

319

320 **Satellite glia support survival and hypertrophy of cultured sympathetic**  
321 **neurons.**

322 We asked if satellite glial cells contributed to sympathetic neuron  
323 development in neonatal cultures by determining whether co-cultured glia acted to  
324 support the survival of NGF-deprived sympathetic neurons. Cultured sympathetic  
325 neurons are normally supported by the addition of 5 ng/ml NGF to the growth  
326 medium (Fig 3a-b). We did not observe a difference in neuron number in glial co-  
327 cultures compared to neurons grown alone. In contrast, NGF deprivation lead to  
328 almost complete neuronal cell death (Fig 3c, g) of neurons grown alone, while co-  
329 culture with satellite glia resulted in a partial rescue of neuronal survival (Fig 3d,  
330 g). We next asked if the survival effects of co-cultured glia were due to glia-derived  
331 NGF. NGF-deprived co-cultures of sympathetic neurons and satellite glia were  
332 treated with either an anti-NGF antibody to block endogenous NGF in the cultures  
333 or with K252a, a kinase inhibitor that blocks the TrkA receptor (Fig 3e, f and g).  
334 The survival effect of glial co-culture was abrogated following either treatment (Fig  
335 3g), indicating that glial-produced neurotrophic factors can contribute to  
336 sympathetic neuron survival during the postnatal period.

337 **Fig 3. Satellite glial cells support neuronal survival.** Satellite glial cells partly  
338 prevent sympathetic neuronal death upon NGF deprivation. (a-b) Establishment of  
339 sympathetic neuron-satellite glia co-cultures. Neurons (N) were cultured alone (a)  
340 or in the presence of satellite glia (b) in the presence of 5 ng/ml NGF in serum-  
341 containing medium. For NGF deprivation experiments (c-g) cultures were initially  
342 plated in the presence of 5 ng/ml NGF in serum-free medium and the medium was  
343 replaced after two days with NGF-free, serum-free medium. Cultures were fixed at  
344 12 days *in vitro* (div) and stained for Tuj-1 (neuronal marker, in red), S100 $\beta$  (glial  
345 cell marker, in green) and DAPI (nuclear staining, in blue). Scale bar represents 50  
346  $\mu$ m. (c) Neurons alone (N), (d) Neurons and glia (N+G), (e) N+G with anti-NGF  
347 antibody (1:1000, final concentration 1  $\mu$ g/ml), and (f) N+G with K252 (1:20000,  
348 final concentration 100 nM). (g) Quantification of cell survival upon NGF  
349 deprivation. Data are shown as percent neuronal survival compared to comparable  
350 cultures (neurons alone or neurons + glia) grown in the presence of 5 ng/ml NGF in  
351 serum-free medium (n = 3 independent cell culture experiments, One-way ANOVA,  
352 \*\*\*p<0.001). All data are represented as mean  $\pm$  s.e.m.

353

354 We next asked if NGF protein could be detected by Western analysis of cell  
355 lysates prepared from isolated, cultured satellite glia. We found expression of NGF  
356 precursor forms (Fig 4a), supporting the idea that glia-derived NGF could have local  
357 effects on sympathetic neurons within the ganglion. We also detected expression of

358 brain-derived neurotrophic factor, another member of the neurotrophin family, in  
359 cultured satellite glia (Fig 4b). Finally, we observed an increase in soma size for  
360 neurons grown in the presence of satellite glia (Table 1), suggesting a role for glia  
361 in neuronal hypertrophy during development. As expected, the cell area calculated  
362 for neurons in culture was larger than that seen for neuronal soma area in ganglionic  
363 sections (see Fig 2d), consistent with the constrained microenvironment *in vivo*.

364 **Fig 4. Satellite glial cells express neurotrophins.** Western blot analyses reveal the  
365 expression of precursor forms of NGF (a) and BDNF (b) by satellite glial cells. Glia  
366 cell lysates were obtained from 3 independent cultures numbered 1-3. The  
367 specificity of the antibodies was assessed by comparing expression levels in HEK  
368 cells transfected with either empty (-), NGF-expressing (NGF) or BDNF-expressing  
369 (BDNF) plasmids. The mature purified neurotrophins were loaded as positive  
370 controls.  $\beta$ -actin expression was used as a loading control.

371

372 **Table 1. Neuronal characteristics of neurons co-cultured with or without glia**

| Cultured conditions               | Neurons alone    | Neurons with glia  |
|-----------------------------------|------------------|--------------------|
| Neuronal size ( $\mu\text{m}^2$ ) | 580.1 $\pm$ 21.7 | 740.6 $\pm$ 53.0** |
| (soma with proximal dendrites)    | (n=43)           | (n=38)             |

|                                        |                        |                         |
|----------------------------------------|------------------------|-------------------------|
| <b>Resting membrane potential (mV)</b> | -53.3 ± 0.8<br>(n=74)  | -56.9 ± 1.0**<br>(n=49) |
| <b>Input resistance (MΩ)</b>           | 421.2 ± 33.2<br>(n=37) | 454.5 ± 67.3<br>(n=36)  |
| <b>Firing threshold (pA)</b>           | 83 ± 7.3<br>(n=10)     | 118 ± 12.2*<br>(n=12)   |

---

373 All results are expressed as mean ± s.e.m. \* $p < 0.05$ , \*\* $p < 0.01$  compared with controls (Neurons alone) using t-test.

374

375 **Satellite glia enhance spontaneous activity of cultured sympathetic**  
376 **neurons**

377 We examined whether satellite glia influenced the active properties of  
378 sympathetic neurons and whether the effects were at the level of intrinsic neuronal  
379 firing properties and/or synaptic activity. Sympathetic neurons form nicotinic  
380 cholinergic synapses onto each other when in culture for 2 weeks or longer [38],  
381 providing a valuable and often used [36, 39, 40] cell culture model to study  
382 ganglionic cholinergic transmission between spinal preganglionic neurons and the  
383 postganglionic sympathetic neurons. We confirmed the cholinergic nature of  
384 sympathetic transmission in the presence of satellite glia by recording neuronal  
385 activity before and after infusion of the nicotinic cholinergic antagonist  
386 hexamethonium bromide. Total activity was measured for 20 minutes and quantified  
387 under control (0-3 min), hexamethonium (6-9 min) and washout (16-19 min)  
388 conditions. Activity was reduced to about 10% of control after hexamethonium  
389 infusion, showing a partial recovery to 55 % after 10 minutes of washout, indicative  
390 of the cholinergic nature of sympathetic transmission for neurons in the presence of  
391 satellite glia (Fig 5a-b).

392 **Fig 5. Satellite glial cells increase spontaneous activity of cultured sympathetic**  
393 **neurons.** (a) Representative traces of spontaneous activity of neurons held in  
394 voltage-clamp at -60 mV, without hexamethonium, with 100  $\mu$ M hexamethonium  
395 and after washout. (b) Average synaptic charge, normalized to control, for neurons

396 treated with 100  $\mu$ M hexamethonium (hex) and following washout (n=10 cells per  
397 condition; paired t-test; \*p<0.05). (c-j) Neurons were cultured for 14 days alone (c,  
398 g) or in the presence of satellite glial cells starting from day 0 (d, h) or day 7 (e, i).  
399 NGF (5ng/ml) was included in all culture conditions to promote neuronal survival.  
400 (c-e) Representative voltage clamp traces showing that co-culture with satellite glial  
401 cells for the 14 days culture period, or for the last 7 days of the period increases  
402 current flow. (f) Quantification of synaptic activity. Total synaptic charge, defined  
403 as the area above the curve for neurons grown in the absence (Neurons alone, N) or  
404 presence of satellite glial cells for 14 days (NG[0]) or the last 7 days of the culture  
405 period (NG[7]), was quantified and average synaptic charge per 10 s duration was  
406 calculated. Plotted average membrane current values were quantified as averaged  
407 synaptic charge normalized to 1 ms duration. Therefore, the value of the average  
408 membrane current of e.g. -400 pA is equivalent to an average synaptic charge of 4  
409 nC (n $\geq$  15 cells, Mann-Whitney U test, \*\*\*p<0.001, \*p<0.05) (g-i) Representative  
410 current clamp traces showing that glial cells increase neuronal firing in cultured  
411 sympathetic neurons. (j) Quantification of neuronal firing rate in the absence (N) or  
412 presence of satellite glial cells for 14 (NG[0]) or 7 (NG[7]) days. (n $\geq$ 10 cells, Mann-  
413 Whitney U test \*\*\*p<0.001, \*p<0.05). Bars represent mean  $\pm$  s.e.m.; dots represent  
414 data for individual cells.

415

416 We used this system to investigate the contribution of satellite glial cells to  
417 the development of sympathetic activity, measuring the spontaneous activity of  
418 sympathetic neurons cultured alone or in the presence of satellite glia. In the co-  
419 culture condition, neurons were grown with satellite glia for the full culture period  
420 (Glia from Day 0, NG[0]) as described in Methods. Spontaneous neuronal activity  
421 was recorded for 5 minutes for neurons in co-culture and neurons grown alone. We  
422 first assessed total current by recording in voltage clamp at a holding potential of -  
423 60 mV. We found that the presence of glia resulted in a strong increase (>30 fold)  
424 in the total charge of sympathetic neurons when compared to the neuron alone  
425 condition (Fig 5c, d and f). Bursts of activity were commonly observed in the  
426 presence of glia, but were absent in the neuron alone cultures.

427 Generation of the post-mitotic neuron-alone cultures requires the use of AraC  
428 to block glia proliferation. We asked if the use of AraC in these cultures contributed  
429 to the low level of activity in comparison to the neuron-glia co-cultures, which were  
430 grown in the absence of AraC. We recorded neuronal activity in cultures (named  
431 “glia from day 7”, NG[7]) in which AraC was initially added to prevent glial  
432 proliferation; at day 7, satellite glial cells grown in a separate dish were re-plated on  
433 top of the neurons at approximately 100,000 cells per dish. These glia also formed  
434 a confluent layer by 10-14 div. The presence of glia from day 7 also increased total  
435 activity by about 10 fold (Fig 5e-f), indicating that glia still exert their effect on  
436 spontaneous activity when added at a later time point in culture even when the  
437 neurons had been exposed to AraC treatment.

438 We next asked whether the increase in neuronal activity was accompanied  
439 by an increase in the frequency of action potential firing. We recorded from neurons  
440 in current clamp and measured spontaneous neuronal activity, finding that neurons  
441 cultured in the presence of glial cells fired more action potentials than neurons  
442 cultured alone (Figs 5g-j). This increase in firing may underlie the occurrence of  
443 synchronous neurotransmitter release from pre-synaptic terminals and hence the  
444 bursts of activity seen in Figs 5d, 5e and 5f.

445 Overall, these results demonstrate that satellite glia derived from sympathetic  
446 ganglia increase the magnitude of neuronal inputs and the firing of cultured  
447 sympathetic neurons. Moreover, glia also exert their effects when added to the  
448 neuronal culture at a later stage (“glia from day 7”), suggesting that the effect is not  
449 dependent on early neurite extension and that glia act directly at synapses or at  
450 voltage-gated ion channels to enhance sympathetic activity.

451

### 452 **Excitable membrane properties of sympathetic neurons grown with** 453 **satellite glia**

454 We next investigated whether co-cultured glia affect neuronal firing  
455 properties in addition to synaptic properties. We examined the intrinsic membrane  
456 properties of neurons grown for 2-3 weeks alone or in the presence of satellite glia  
457 isolated from the same ganglia. We recorded from sympathetic neurons in whole  
458 cell current clamp and assessed resting membrane potential and input resistance



459 (Table 1). There was no difference in neuronal input resistance between neurons  
460 grown in the presence or absence of glia. We observed a significant increase in  
461 neuronal resting membrane potential in the presence of glial cells.

462 We measured the effect of satellite glia on sympathetic intrinsic excitability  
463 by determining the neuronal firing in response to stimuli for neurons grown alone  
464 compared to neurons grown with glia. We analyzed the response of neurons to steps  
465 of depolarizing current in the presence of the cholinergic transmission blocker  
466 hexamethonium. Firing threshold, i.e. the minimum current needed to elicit an  
467 action potential, was determined by applying depolarizing currents steps in 10 pA  
468 increments (Fig 6a). We found a trend toward an increase in firing threshold in the  
469 presence of glia, although the difference was not statistically significant (Fig 6b).  
470 Next, we measured the number of spikes evoked by depolarizing current steps  
471 ranging from 0 to 400 pA (Fig 6c). There was a trend, that did not reach significance,  
472 towards a decrease in the number of APs fired by neurons cultured in the presence  
473 of glia in response to the current pulses (Fig 6d).

474 **Fig 6. Satellite glial cells do not alter neuronal intrinsic excitability.** (a)  
475 Illustration of the stimulus pattern applied to determine neuronal firing threshold.  
476 (b) Quantification of neuronal firing threshold between neurons alone (N) and  
477 neurons co-cultured with glia for 14 days (N+G) conditions. (Unpaired t-test,  $n \geq$   
478 16 cells, n.s. not statistically different). (c) Illustration of the stimulus pattern  
479 applied to evoke action potential firing and representative neuronal traces in  
480 response to 400 pA current pulse for neurons grown for 14 days alone (brown, upper

481 trace) or in the presence of glia (blue, lower trace). (d) Average number of action  
482 potentials evoked by current steps of increasing amplitude. ( $n \geq 16$  cells, Mann-  
483 Whitney U test pairwise comparison for 400 pA current step, n.s. not statistically  
484 different). Results are represented as mean  $\pm$  s.e.m.

485

### 486 **Satellite glia exert their effect via released factors**

487 The effect of glia on sympathetic synaptic activity may be mediated by  
488 contact or by diffusible factors, or both. If diffusible factors play a role in this  
489 regulation, we would expect that glial cell-conditioned medium (GCM) would be  
490 sufficient to increase sympathetic neuron activity. We cultured glial cells until they  
491 reached confluency and allowed them to grow for an additional 3 days in serum-  
492 free medium before collecting the medium. The GCM was concentrated (see  
493 Methods) and added to sympathetic neurons that had been cultured alone for 7 days.  
494 Control medium (C) from fresh serum-free medium (not conditioned by glial cells)  
495 was concentrated to the same level as the GCM and added to neurons following the  
496 same protocol as for GCM (Figs. 7a and 7b). Following addition of GCM or C  
497 neurons were cultured for an additional 7 days. We compared spontaneous activity  
498 of neurons cultured in the presence of C or GCM at 14 div. The GCM did not affect  
499 neuronal survival, as neuron number was unaltered when compared to C (Fig 7c).  
500 Culture in GCM resulted in a  $>13$  fold increase in sympathetic activity (Figs 7d-7f),  
501 comparable to the effect observed in the presence of satellite glial cells in culture

502 from day 7 (Fig 5e-f). These data indicate that factor(s) released by satellite glial  
503 cells increase sympathetic activity. While we cannot rule out additional effects of  
504 glial cell contact, it seems likely that released factors are the main modulators of  
505 sympathetic activity, at least in cell culture, since GCM fully mimics the effect of  
506 satellite glial cells.

507 **Fig 7. Glial cell-conditioned medium recapitulates the effect of satellite glial**  
508 **cells on cultured sympathetic neuron activity.** (a-b) Neurons grown in control  
509 medium - C (a) or glial cell-conditioned medium - GCM (b) for the last 7 days of  
510 the 14-day culture period. NGF (5ng/ml) was added to both culture conditions to  
511 promote neuronal survival. Cells were fixed and stained for Tuj-1 (neuronal marker,  
512 in red), S100 $\beta$  (glial cell marker, in green) and DAPI (nuclear staining, in blue).  
513 Scale bar represents 50  $\mu$ m. (c) Neuronal cell number was not altered by the cell  
514 culture condition. (n = 6 independent cell culture experiments, unpaired t-test, n.s.).  
515 (d-e) Representative voltage-clamp traces of neurons cultured in C (d) or GCM (e).  
516 (f) Quantification of average membrane current showing increased spontaneous  
517 activity in GCM (n  $\geq$  12 cells, non-parametric Mann-Whitney U test, \*\*\*p<0.001).  
518 Results are represented as mean  $\pm$  s.e.m., dots represent data for individual cells.

519

520 We next asked whether glial cells had an effect on the development of  
521 synaptic sites. Soma and dendrites are important sites of synapse formation on  
522 peripheral sympathetic neurons [36, 41, 42]. We immunostained neurons using the

523 vesicular acetylcholine transporter protein (VACHT) as a pre-synaptic marker, and  
524 the scaffold protein Shank (Shank) as a post-synaptic marker [43], and looked for  
525 their co-localization on cell bodies and proximal dendrites (Fig 8a). We quantified  
526 the number of pre-, post- and co-localized puncta and the size of co-localized puncta  
527 in cultures of neurons grown alone and in the presence of glial cells (Fig 8b-d). Co-  
528 culture with glia increased the number (Fig 8c) as well as the size (Fig 8d) of  
529 colocalized puncta on sympathetic neurons. There was a significant difference in  
530 the number of VACHT-positive puncta, but we observed no significant increase in  
531 the number of Shank-positive puncta (Fig 8b). This suggests a presynaptic effect of  
532 glia on the development of sympathetic synaptic sites, although additional  
533 postsynaptic mechanisms cannot be ruled out. These results suggest that glia  
534 promote increased sympathetic activity by promoting structural synapse formation.

535 **Fig 8. Satellite glial cells enhance cholinergic synapse formation.** Neurons  
536 cultured in the absence (Neurons alone, N) or presence of satellite glial cells (N+G)  
537 were fixed, stained for synaptic markers, and analyzed by confocal microscopy. (a)  
538 Representative images of cells stained for the pre-synaptic marker VACHT (red),  
539 the post-synaptic marker Shank (green), and the dendritic marker MAP2 (blue).  
540 Boxed regions in left panels are magnified in the right panels to show colocalized  
541 puncta (arrows). Scale bar represents 10  $\mu\text{m}$  in the left panels; 2  $\mu\text{m}$  in the right  
542 panels. (b) Quantification of VACHT and Shank puncta on sympathetic neuronal  
543 soma and proximal dendrites showing a glia-dependent increase in the expression  
544 of VACHT, but not Shank-containing puncta ( $n \geq 61$  cells, unpaired t-test

545 \*\*\* $p < 0.001$  and n.s., respectively). Quantification of co-localized synaptic puncta  
546 density (c) and size (d) on neuronal soma and proximal dendrites showing that glia  
547 induce structural synapse formation ( $n \geq 61$  cells, unpaired t-test, \*\*\* $p < 0.001$ ,  
548 \*\* $p < 0.01$ , respectively).

## 550 **Discussion**

551 We report a role for satellite glial cells in the establishment of mature  
552 sympathetic neuron structure and function within peripheral ganglia. Satellite glia  
553 contribute to the survival of cultured postnatal sympathetic neurons and potentiate  
554 sympathetic cholinergic synaptic activity and structural synapse formation. The  
555 effects of satellite glia are mediated by released factors, which include NGF and  
556 BDNF, two known modulators of sympathetic neuron activity [39, 44, 45]. This  
557 work defines sympathetic satellite glia as regulators of peripheral neuronal  
558 development and provides a new path for understanding mechanisms leading to  
559 heightened sympathetic tone.

560 The actions of satellite glial cells in regulating synapse formation and  
561 neuronal activity within the sympathetic ganglia share some common features with  
562 astrocytes in the central nervous system [1, 46]. While this illustrates a convergence  
563 in function between these two glial cell types of different embryonic origins, the  
564 neuronal targets of glial regulation are distinct. Astrocytes regulate many aspects of  
565 excitatory glutamatergic and inhibitory GABAergic transmission in the CNS [13,  
566 47-49], while in the periphery, we show that sympathetic satellite glia promote the  
567 development of spontaneous network activity at cholinergic synapses.

568 Outside of the mammalian CNS, glial regulation of cholinergic systems has  
569 been reported in *Lymnaea stagnalis*, where cholinergic neurons grown in the  
570 presence of glial cells have decreased postsynaptic responses to presynaptic

571 stimulation [50]. Non-neuronal ganglionic cells also regulate short-term plasticity  
572 at sympathetic cholinergic autapses without an effect on synaptic development [29].  
573 Earlier work suggested a role in synapse formation by showing that unidentified  
574 non-neuronal cells promoted evoked release of acetylcholine in mass cultures of  
575 sympathetic neurons [51]. Taken together with our findings of increased synapse  
576 number and spontaneous synaptic transmission in sympathetic neurons co-cultured  
577 with satellite glial cells, these studies show that glial modulation of cholinergic  
578 properties is characterized by system-specific properties. Our work shows that  
579 within the developing sympathetic system, glial cells release soluble factors that  
580 contribute to the development and dynamics of cholinergic circuits.

581 System-specific characteristics of glial modulation are also seen by  
582 comparing satellite glial actions in peripheral sensory and sympathetic ganglia [23].  
583 Satellite glial cells of the sensory ganglia have been studied in the context of  
584 abnormal pain conditions and were found to contribute to neuronal hyperexcitability  
585 [52, 53]. In our study we analyzed, and did not find a significant difference in  
586 intrinsic excitability of sympathetic neurons cultured in the presence of satellite glia  
587 (Fig 5). This differential effect of satellite glia in sympathetic and sensory ganglia  
588 may reflect anatomical differences between these ganglia, since sensory ganglia do  
589 not receive inputs from central preganglionic neurons, and do not contain dendrites  
590 or synapses. It thus seems likely that glia affect distinct neuronal properties in these  
591 two peripheral ganglia, an idea that is supported by the synaptic effects and absence  
592 of changes in excitability in our cultures.

593 Our finding of glial regulation of cholinergic transmission and presynaptic  
594 protein expression suggests a regulatory circuit in which glial factors act to increase  
595 neuronal acetylcholine release, which in turn acts on the glial cells to modulate glial  
596 activity. This model is supported by recent work demonstrating changes in  
597 sympathetic satellite glial activity in response to glial muscarinic cholinergic  
598 receptor activation [54]. This cholinergic signaling resulted in an increase in glial  
599 calcium signaling, glial activation and electrical coupling between glial cells,  
600 suggesting that activity in neural circuits may be set by reciprocal signaling between  
601 neurons and their surrounding glia.

602 In the CNS, astrocyte cell function is also modulated by cholinergic  
603 signaling, resulting in glial regulation of glutamatergic or GABAergic  
604 neurotransmission. In the hippocampus, for instance, astrocytes act as a sensor for  
605 septal-derived acetylcholine associated with wakefulness, resulting in gating of  
606 glutamatergic transmission through NMDA receptors [46]. Cholinergic modulation  
607 of hippocampal astrocytes also leads to long-term inhibition of dentate granule cells  
608 through direct glial excitation of inhibitory interneurons [55]. In addition,  
609 cholinergic modulation of glial cell function has been observed in the retina [56]  
610 and the enteric nervous system [57]. Together, these studies demonstrate wide-  
611 spread actions of cholinergic signaling on glial activity states; however less is  
612 known about reciprocal signaling from astrocytes to cholinergic synapses. Our work  
613 in the peripheral nervous system suggests that these effects may be part of a broader  
614 regulatory system that includes glial control of their cholinergic inputs.



615           Satellite glia regulated multiple developmental processes in this study,  
616 including neuronal survival (Fig 3), cell body hypertrophy (Table 1) and cholinergic  
617 synapse formation (Fig 7). These are all promoted by NGF in developing  
618 sympathetic neurons [36, 58-60]. We showed that NGF released by satellite glia  
619 partially supported the survival of the cultured sympathetic neurons. The production  
620 of neurotrophins by satellite glia is consistent with the reported expression of  
621 neurotrophins in other central and peripheral glial populations [61-65]. However,  
622 extensive evidence points to the central role of target-derived NGF produced by  
623 peripheral organs in the survival and morphological maturation of postnatal  
624 sympathetic neurons [37, 66]. Thus, our data suggest that glial-derived neurotrophic  
625 factors may provide a secondary source of neurotrophic signaling during postnatal  
626 development and in the mature the sympathetic circuit.

627           We previously showed synaptic modulation of sympathetic cholinergic  
628 transmission by neurotrophins [39], but further work will be needed to determine if  
629 glial-derived neurotrophins contribute to the synaptic effects of glial cells. We do  
630 not expect that glial-derived NGF is the primary source of neurotrophic signaling in  
631 this system, as NGF is retrogradely transported from peripheral targets *in vivo* [67].  
632 It is interesting to speculate, however, that ganglionic sources of such factors could  
633 play a stabilizing role during development or following nerve injury. Peripheral  
634 nerve injury is accompanied by a reduction in NGF retrograde transport [68] and a  
635 dramatic decrease in sympathetic neuron activity and cholinergic synapses within  
636 the ganglia [69]. Thus, ganglionic sources of NGF could provide a compensatory

637 source of neurotrophic signaling and would be consistent with activation of glia  
638 during pathological disruptions [70, 71].

639 The effects of satellite glia on sympathetic synaptic function suggest the  
640 potential for ongoing glial regulation in the sympathetic system. This is of particular  
641 interest in pathological situations, such as in cardiovascular disorders in which  
642 sympathetic over-activation is a common feature [19-21]. This idea is consistent  
643 with recently published work using selective activation of a glial-expressed Gq  
644 protein-coupled receptor in transgenic mice to show that acutely activated glial cells  
645 *in vivo* increased heart rate and cardiac output through the actions of the peripheral  
646 sympathetic system [27, 28]. This increase in heart rate was abolished by selective  
647 inhibition of peripheral glia activation, further establishing satellite glia as  
648 regulators of sympathetic-mediated cardiac function. The work described here  
649 demonstrates a link between ganglionic satellite glia and functional changes in the  
650 electrical properties of sympathetic neurons, providing a mechanistic model for the  
651 actions of satellite glia in driving heightened sympathetic tone and suggesting these  
652 glia as potential new targets to treat diseases of the peripheral organs.

653

## 654 **Acknowledgements**

655 We thank the members of the Turrigiano laboratory for their support and discussions  
656 on the project, and S. Van Hooser and J. Maier for assistance with coding in MatLab.  
657 We gratefully acknowledge G. Turrigiano, V. Tatarvarty, and M. Nahmani for help

658 in refining the manuscript. We also thank Cagla Eroglu for providing us the Puncta  
659 Analyzer plug-in, and Masami Kojima for providing plasmids.

660

## 661 **References**

- 662 1. Allen NJ, Barres BA. Neuroscience: Glia - more than just brain glue. *Nature*.  
663 2009;457(7230):675-7.
- 664 2. Freeman MR, Rowitch DH. Evolving concepts of gliogenesis: a look way back and  
665 ahead to the next 25 years. *Neuron*. 2013;80(3):613-23.
- 666 3. Devinsky O, Vezzani A, Najjar S, De Lanerolle NC, Rogawski MA. Glia and  
667 epilepsy: excitability and inflammation. *Trends Neurosci*. 2013;36(3):174-84.
- 668 4. Araque A, Carmignoto G, Haydon PG, Oliet SH, Robitaille R, Volterra A.  
669 Gliotransmitters travel in time and space. *Neuron*. 2014;81(4):728-39.
- 670 5. Pannasch U, Rouach N. Emerging role for astroglial networks in information  
671 processing: from synapse to behavior. *Trends Neurosci*. 2013;36(7):405-17.
- 672 6. Ullian EM, Sapperstein SK, Christopherson KS, Barres BA. Control of synapse  
673 number by glia. *Science*. 2001;291(5504):657-61.
- 674 7. Buard I, Steinmetz CC, Claudepierre T, Pfrieger FW. Glial cells promote dendrite  
675 formation and the reception of synaptic input in Purkinje cells from postnatal mice. *Glia*.  
676 2010;58(5):538-45.
- 677 8. Hughes EG, Elmariah SB, Balice-Gordon RJ. Astrocyte secreted proteins  
678 selectively increase hippocampal GABAergic axon length, branching, and synaptogenesis.  
679 *Mol Cell Neurosci*. 2010;43(1):136-45.

- 680 9. Allen NJ, Bennett ML, Foo LC, Wang GX, Chakraborty C, Smith SJ, et al.  
681 Astrocyte glypicans 4 and 6 promote formation of excitatory synapses via GluA1 AMPA  
682 receptors. *Nature*. 2012;486(7403):410-4.
- 683 10. Pfrieger FW, Barres BA. Synaptic efficacy enhanced by glial cells in vitro. *Science*.  
684 1997;277(5332):1684-7.
- 685 11. Pannasch U, Freche D, Dallerac G, Ghezali G, Escartin C, Ezan P, et al. Connexin  
686 30 sets synaptic strength by controlling astroglial synapse invasion. *Nat Neurosci*.  
687 2014;17(4):549-58.
- 688 12. Chung WS, Clarke LE, Wang GX, Stafford BK, Sher A, Chakraborty C, et al.  
689 Astrocytes mediate synapse elimination through MEGF10 and MERTK pathways. *Nature*.  
690 2013;504(7480):394-400.
- 691 13. Clarke LE, Barres BA. Emerging roles of astrocytes in neural circuit development.  
692 *Nat Rev Neurosci*. 2013;14(5):311-21.
- 693 14. Allen NJ. Role of glia in developmental synapse formation. *Current opinion in*  
694 *neurobiology*. 2013;23(6):1027-33.
- 695 15. Carty MM, Freeman MR. Cell biology in neuroscience: Architects in neural circuit  
696 design: glia control neuron numbers and connectivity. *The Journal of cell biology*.  
697 2013;203(3):395.
- 698 16. Garden GA, La Spada AR. Intercellular (mis)communication in neurodegenerative  
699 disease. *Neuron*. 2012;73(5):886-901.
- 700 17. McGann JC, Liroy DT, Mandel G. Astrocytes conspire with neurons during  
701 progression of neurological disease. *Current opinion in neurobiology*. 2012;22(5):850-8.

- 702 18. Barman SM, Yates BJ. Deciphering the Neural Control of Sympathetic Nerve  
703 Activity: Status Report and Directions for Future Research. *Frontiers in Neuroscience*.  
704 2017;11(730):1-14.
- 705 19. Guyenet PG. The sympathetic control of blood pressure. *Nat Rev Neurosci*.  
706 2006;7(5):335-46.
- 707 20. Kaye D, Esler M. Sympathetic neuronal regulation of the heart in aging and heart  
708 failure. *Cardiovasc Res*. 2005;66(2):256-64.
- 709 21. Dutta P, Courties G, Wei Y, Leuschner F, Gorbатов R, Robbins CS, et al.  
710 Myocardial infarction accelerates atherosclerosis. *Nature*. 2012;487(7407):325-9.
- 711 22. Saper CB. The central autonomic nervous system: conscious visceral perception  
712 and autonomic pattern generation. *Annual review of neuroscience*. 2002;25:433-69.
- 713 23. Hanani M. Satellite glial cells in sympathetic and parasympathetic ganglia: in  
714 search of function. *Brain Res Rev*. 2010;64(2):304-27.
- 715 24. Bushong EA, Martone ME, Jones YZ, Ellisman MH. Protoplasmic astrocytes in  
716 CA1 stratum radiatum occupy separate anatomical domains. *Journal of Neuroscience*;  
717 2002;22(1):183-92.
- 718 25. Huang TY, Hanani M, Ledda M, De Palo S, Pannese E. Aging is associated with  
719 an increase in dye coupling and in gap junction number in satellite glial cells of murine  
720 dorsal root ganglia. *Neuroscience*. 2006;137(4):1185-92.
- 721 26. Hu P, McLachlan EM. Inflammation in sympathetic ganglia proximal to sciatic  
722 nerve transection in rats. *Neuroscience letters*. 2004;365(1):39-42.

- 723 27. Agulhon C, Boyt KM, Xie AX, Friocourt F, Roth BL, McCarthy K. Modulation of  
724 the autonomic nervous system by acute glial cell Gq-PCR activation in vivo. *The Journal*  
725 *of physiology*. 2013;591(22):5599-609.
- 726 28. Xie AX, Lee JJ, McCarthy KD. Ganglionic GFAP glial Gq-PCR signaling  
727 enhances heart functions in vivo. *JCI insight*. 2017;2(2):e90565.
- 728 29. Perez-Gonzalez AP, Albrecht D, Blasi J, Llobet A. Schwann cells modulate short-  
729 term plasticity of cholinergic autaptic synapses. *The Journal of physiology*. 2008;586(Pt  
730 19):4675-91.
- 731 30. Verdi JM, Groves AK, Farinas I, Jones K, Marchionni MA, Reichardt LF, et al. A  
732 reciprocal cell-cell interaction mediated by NT-3 and neuregulins controls the early  
733 survival and development of sympathetic neuroblasts. *Neuron*. 1996;16(3):515-27.
- 734 31. Tropea M, Johnson MI, Higgins D. Glial cells promote dendritic development in  
735 rat sympathetic neurons in vitro. *Glia*. 1988;1(6):380-92.
- 736 32. Barish ME. Modulation of the electrical differentiation of neurons by interactions  
737 with glia and other non-neuronal cells. *Perspectives on developmental neurobiology*.  
738 1995;2(4):357-70.
- 739 33. McFarlane S, Cooper E. Extrinsic factors influence the expression of voltage-gated  
740 K currents on neonatal rat sympathetic neurons. *Journal of Neuroscience*;  
741 1993;13(6):2591-600.
- 742 34. Suter U, Heymach JV, Jr., Shooter EM. Two conserved domains in the NGF  
743 propeptide are necessary and sufficient for the biosynthesis of correctly processed and  
744 biologically active NGF. *The EMBO journal*. 1991;10(9):2395-400.

- 745 35. Heymach JV, Jr., Shooter EM. The biosynthesis of neurotrophin heterodimers by  
746 transfected mammalian cells. *The Journal of biological chemistry*. 1995;270(20):12297-  
747 304.
- 748 36. Sharma N, Deppmann CD, Harrington AW, St Hillaire C, Chen ZY, Lee FS, et al.  
749 Long-distance control of synapse assembly by target-derived NGF. *Neuron*.  
750 2010;67(3):422-34.
- 751 37. Davis BM, Wang HS, Albers KM, Carlson SL, Goodness TP, McKinnon D. Effects  
752 of NGF overexpression on anatomical and physiological properties of sympathetic  
753 postganglionic neurons. *Brain research*. 1996;724(1):47-54.
- 754 38. O'Lague PH, Obata K, Claude P, Furshpan EJ, Potter DD. Evidence for cholinergic  
755 synapses between dissociated rat sympathetic neurons in cell culture. *Proc Natl Acad Sci*  
756 *U S A*. 1974;71(9):3602-6.
- 757 39. Luther JA, Enes J, Birren SJ. Neurotrophins regulate cholinergic synaptic  
758 transmission in cultured rat sympathetic neurons through a p75-dependent mechanism. *J*  
759 *Neurophysiol*. 2013;109(2):485-96.
- 760 40. Campanucci V, Krishnaswamy A, Cooper E. Diabetes depresses synaptic  
761 transmission in sympathetic ganglia by inactivating nAChRs through a conserved  
762 intracellular cysteine residue. *Neuron*. 2010;66(6):827-34.
- 763 41. Gingras J, Rassadi S, Cooper E, Ferns M. Agrin plays an organizing role in the  
764 formation of sympathetic synapses. *J Cell Biol*. 2002;158(6):1109-18.
- 765 42. Gingras J, Ferns M. Expression and localization of agrin during sympathetic  
766 synapse formation in vitro. *J Neurobiol*. 2001;48(3):228-42.

- 767 43. Parker MJ, Zhao S, Brecht DS, Sanes JR, Feng G. PSD93 regulates synaptic stability  
768 at neuronal cholinergic synapses. *Journal of Neuroscience*; 2004;24(2):378-88.
- 769 44. Slonimsky JD, Yang B, Hinterneder JM, Nokes EB, Birren SJ. BDNF and CNTF  
770 regulate cholinergic properties of sympathetic neurons through independent mechanisms.  
771 *Molecular and Cellular Neuroscience*. 2003;23(4):648-60.
- 772 45. Arias ER, Valle-Leija P, Morales MA, Cifuentes F. Differential contribution of  
773 BDNF and NGF to long-term potentiation in the superior cervical ganglion of the rat.  
774 *Neuropharmacology*. 2014;81:206-14.
- 775 46. Papouin T, Dunphy J, Tolman M, Foley JC, Haydon PG. Astrocytic control of  
776 synaptic function. *Philosophical transactions of the Royal Society of London Series B,*  
777 *Biological sciences*. 2017;372(1715).
- 778 47. Baldwin KT, Eroglu C. Molecular mechanisms of astrocyte-induced  
779 synaptogenesis. *Current opinion in neurobiology*. 2017;45:113-20.
- 780 48. Um JW. Roles of Glial Cells in Sculpting Inhibitory Synapses and Neural Circuits.  
781 *Frontiers in molecular neuroscience*. 2017;10:381.
- 782 49. Turko P, Groberman K, Browa F, Cobb S, Vida I. Differential Dependence of  
783 GABAergic and Glutamatergic Neurons on Glia for the Establishment of Synaptic  
784 Transmission. *Cerebral cortex (New York, NY : 1991)*. 2019;29(3):1230-43.
- 785 50. Smit AB, Syed NI, Schaap D, van Minnen J, Klumperman J, Kits KS, et al. A glia-  
786 derived acetylcholine-binding protein that modulates synaptic transmission. *Nature*.  
787 2001;411(6835):261-8.



- 788 51. O'Lague PH, Furshpan EJ, Potter DD. Studies on rat sympathetic neurons  
789 developing in cell culture. II. Synaptic mechanisms. *Developmental biology*.  
790 1978;67(2):404-23.
- 791 52. Hanani M. Satellite glial cells in sensory ganglia: from form to function. *Brain Res*  
792 *Brain Res Rev*. 2005;48(3):457-76.
- 793 53. Retamal MA, Alcayaga J, Verdugo CA, Bultynck G, Leybaert L, Saez PJ, et al.  
794 Opening of pannexin- and connexin-based channels increases the excitability of nodose  
795 ganglion sensory neurons. *Front Cell Neurosci*. 2014;8(158):1-12.
- 796 54. Feldman-Goriachnik R, Wu B, Hanani M. Cholinergic responses of satellite glial  
797 cells in the superior cervical ganglia. *Neuroscience letters*. 2018;671:19-24.
- 798 55. Pabst M, Braganza O, Dannenberg H, Hu W, Pothmann L, Rosen J, et al. Astrocyte  
799 Intermediaries of Septal Cholinergic Modulation in the Hippocampus. *Neuron*.  
800 2016;90(4):853-65.
- 801 56. Rosa JM, Bos R, Sack GS, Fortuny C, Agarwal A, Bergles DE, et al. Neuron-glia  
802 signaling in developing retina mediated by neurotransmitter spillover. *eLife*. 2015;4.
- 803 57. Delvalle NM, Fried DE, Rivera-Lopez G, Gaudette L, Gulbransen BD. Cholinergic  
804 activation of enteric glia is a physiological mechanism that contributes to the regulation of  
805 gastrointestinal motility. *American journal of physiology Gastrointestinal and liver*  
806 *physiology*. 2018;315(4):G473-g83.
- 807 58. Ruit KG, Osborne PA, Schmidt RE, Johnson EM, Jr., Snider WD. Nerve growth  
808 factor regulates sympathetic ganglion cell morphology and survival in the adult mouse.  
809 *Journal of Neuroscience*; 1990;10(7):2412-9.

- 810 59. Kuruvilla R, Zweifel LS, Glebova NO, Lonze BE, Valdez G, Ye H, et al. A  
811 neurotrophin signaling cascade coordinates sympathetic neuron development through  
812 differential control of TrkA trafficking and retrograde signaling. *Cell*. 2004;118(2):243-  
813 55.
- 814 60. Lockhart ST, Mead JN, Pisano JM, Slonimsky JD, Birren SJ. Nerve growth factor  
815 collaborates with myocyte-derived factors to promote development of presynaptic sites in  
816 cultured sympathetic neurons. *J Neurobiol*. 2000;42(4):460-76.
- 817 61. Rudge JS, Alderson RF, Pasnikowski E, McClain J, Ip NY, Lindsay RM.  
818 Expression of Ciliary Neurotrophic Factor and the Neurotrophins-Nerve Growth Factor,  
819 Brain-Derived Neurotrophic Factor and Neurotrophin 3-in Cultured Rat Hippocampal  
820 Astrocytes. *The European journal of neuroscience*. 1992;4(6):459-71.
- 821 62. Wetmore C, Olson L. Neuronal and nonneuronal expression of neurotrophins and  
822 their receptors in sensory and sympathetic ganglia suggest new intercellular trophic  
823 interactions. *J Comp Neurol*. 1995;353(1):143-59.
- 824 63. Jha MK, Kim JH, Song GJ, Lee WH, Lee IK, Lee HW, et al. Functional dissection  
825 of astrocyte-secreted proteins: Implications in brain health and diseases. *Progress in*  
826 *neurobiology*. 2018;162:37-69.
- 827 64. Thippeswamy T, McKay JS, Morris R, Quinn J, Wong LF, Murphy D. Glial-  
828 mediated neuroprotection: Evidence for the protective role of the NO-cGMP pathway via  
829 neuron-glia communication in the peripheral nervous system. *Glia*. 2005;49(2):197-210.
- 830 65. Elmariah SB, Hughes EG, Oh EJ, Balice-Gordon RJ. Neurotrophin signaling  
831 among neurons and glia during formation of tripartite synapses. *Neuron Glia Biol*.  
832 2004;1(4):1-11.

- 833 66. Fagan AM, Zhang H, Landis S, Smeyne RJ, Silos-Santiago I, Barbacid M. TrkA,  
834 but not TrkC, receptors are essential for survival of sympathetic neurons in vivo. The  
835 Journal of Neuroscience; 1996;16(19):6208-18.
- 836 67. Harrington AW, Ginty DD. Long-distance retrograde neurotrophic factor signalling  
837 in neurons. Nat Rev Neurosci. 2013;14(3):177-87.
- 838 68. Raivich G, Hellweg R, Kreutzberg GW. NGF receptor-mediated reduction in  
839 axonal NGF uptake and retrograde transport following sciatic nerve injury and during  
840 regeneration. Neuron. 1991;7(1):151-64.
- 841 69. Purves D. Functional and structural changes in mammalian sympathetic neurones  
842 following interruption of their axons. The Journal of physiology. 1975;252(2):429-63.
- 843 70. Zhou XF, Deng YS, Chie E, Xue Q, Zhong JH, McLachlan EM, et al. Satellite-cell-  
844 derived nerve growth factor and neurotrophin-3 are involved in noradrenergic sprouting in  
845 the dorsal root ganglia following peripheral nerve injury in the rat. The European journal  
846 of neuroscience. 1999;11(5):1711-22.
- 847 71. Jones EV, Bouvier DS. Astrocyte-secreted extracellular matrix proteins in CNS  
848 remodelling during development and disease. Neural Plast. 2014;2014(321209):1-12.
- 849

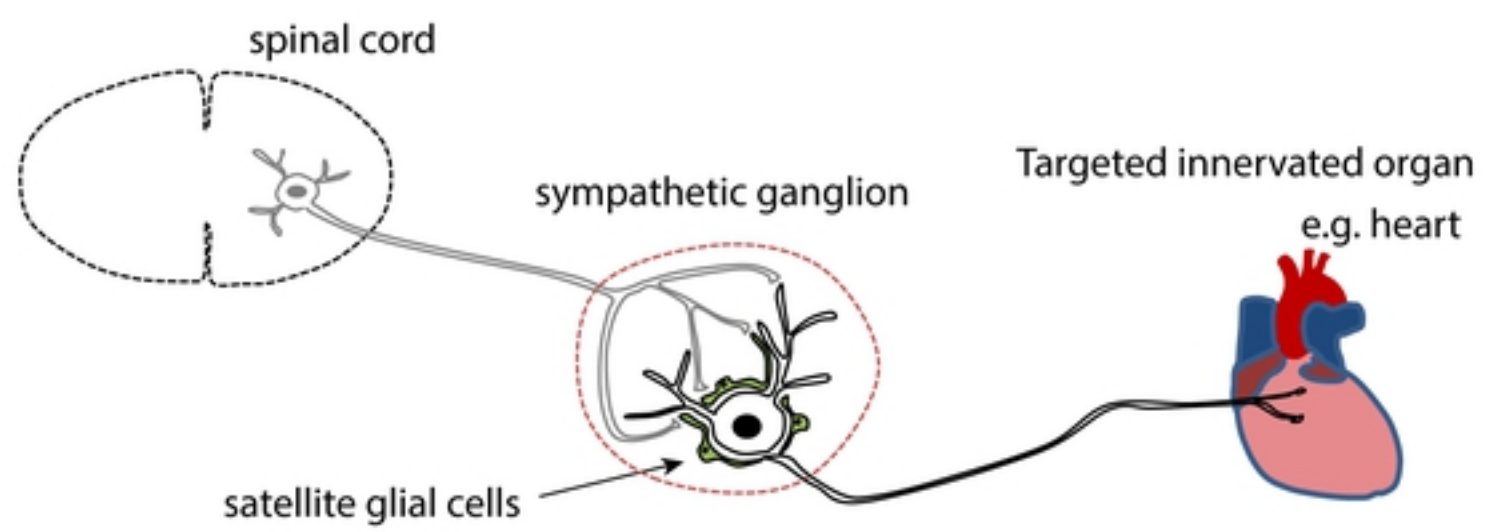

Fig. 1

bioRxiv preprint doi: <https://doi.org/10.1101/664557>; this version posted June 7, 2019. The copyright holder for this preprint (which was not certified by peer review) is the author/funder, who has granted bioRxiv a license to display the preprint in perpetuity. It is made available under aCC-BY 4.0 International license.

bioRxiv preprint doi: <https://doi.org/10.1101/064557>; this version posted June 7, 2019. The copyright holder for this preprint (which was not certified by peer review) is the author/funder, who has granted bioRxiv a license to display the preprint in perpetuity. It is made available under aCC-BY 4.0 International license.

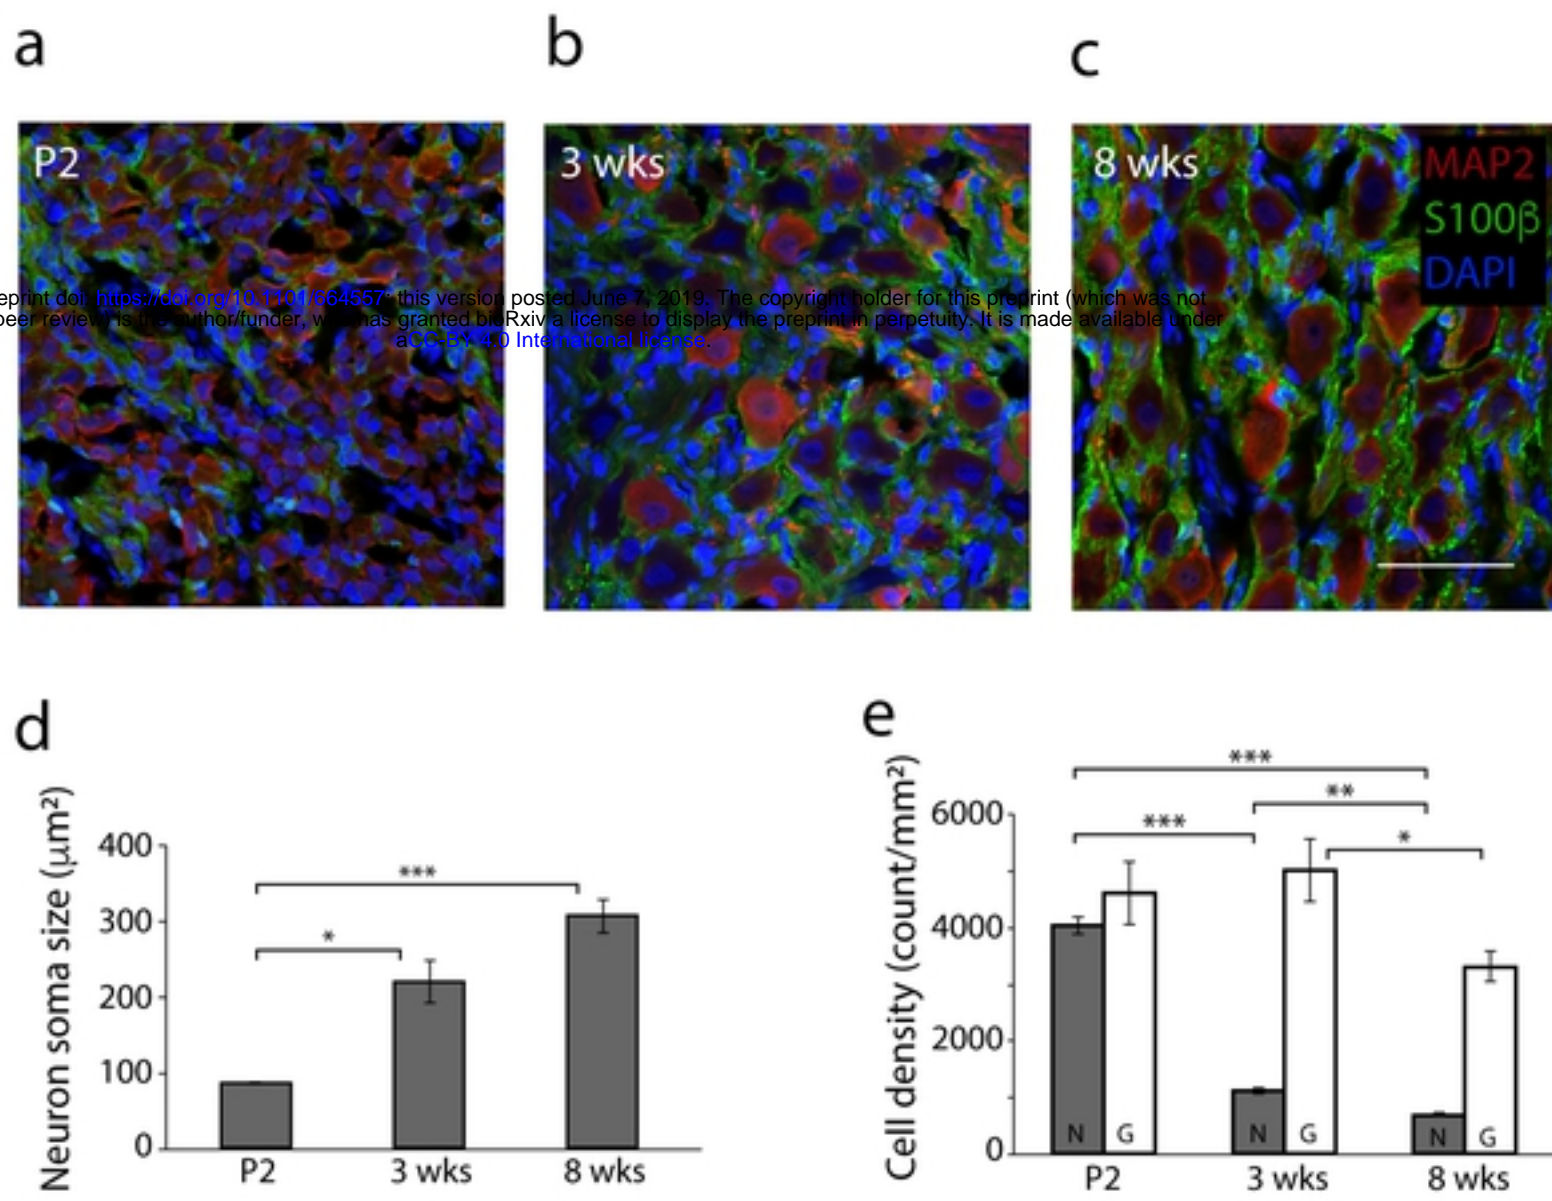

Fig. 2.

bioRxiv preprint doi: <https://doi.org/10.1101/664557>; this version posted August 1, 2020. The copyright holder for this preprint (which was not certified by peer review) is the author/funder, who has granted bioRxiv a license to display the preprint in perpetuity. It is made available under aCC-BY 4.0 International license.

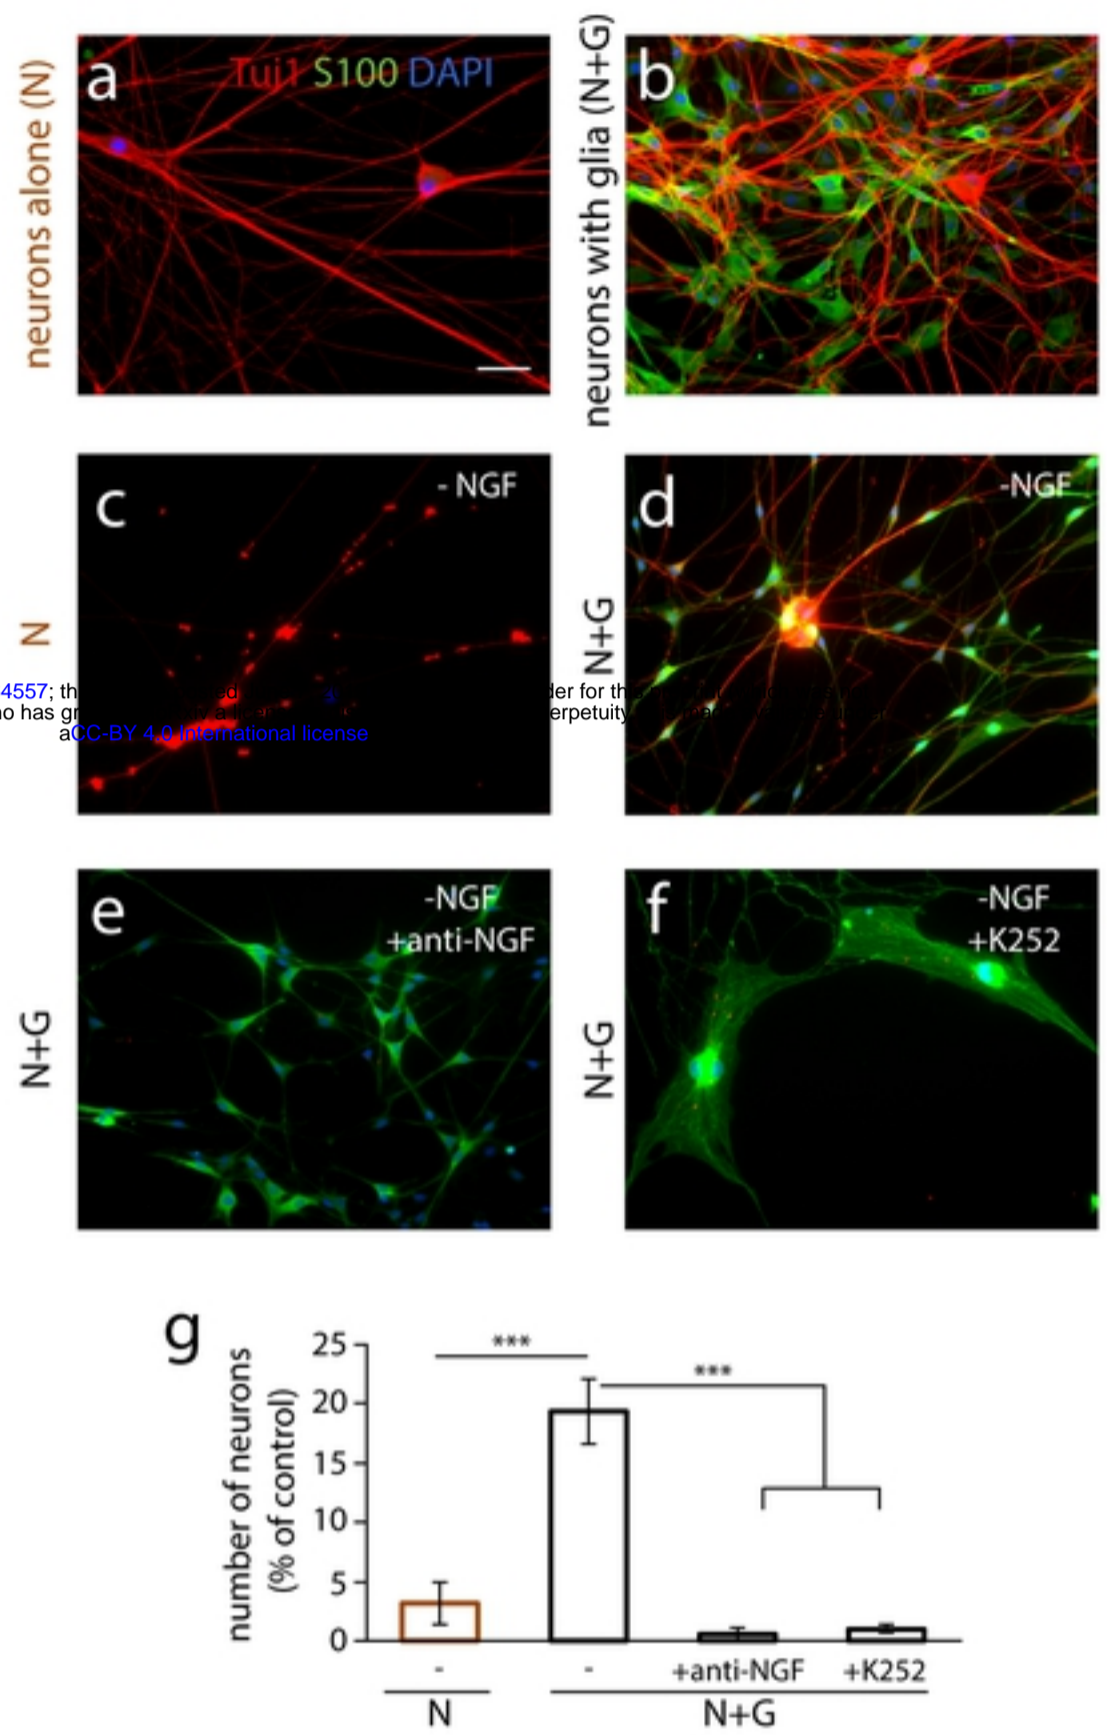

Fig. 3.

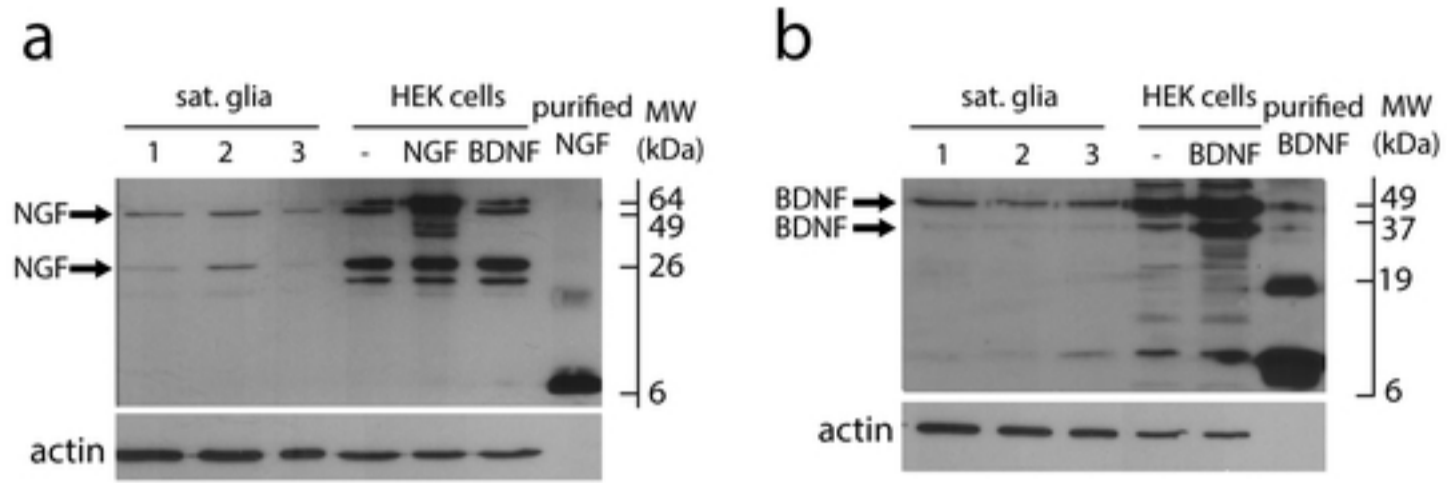

Fig. 4.

bioRxiv preprint doi: <https://doi.org/10.1101/664557>; this version posted June 7, 2019. The copyright holder for this preprint (which was not certified by peer review) is the author/funder, who has granted bioRxiv a license to display the preprint in perpetuity. It is made available under aCC-BY 4.0 International license.

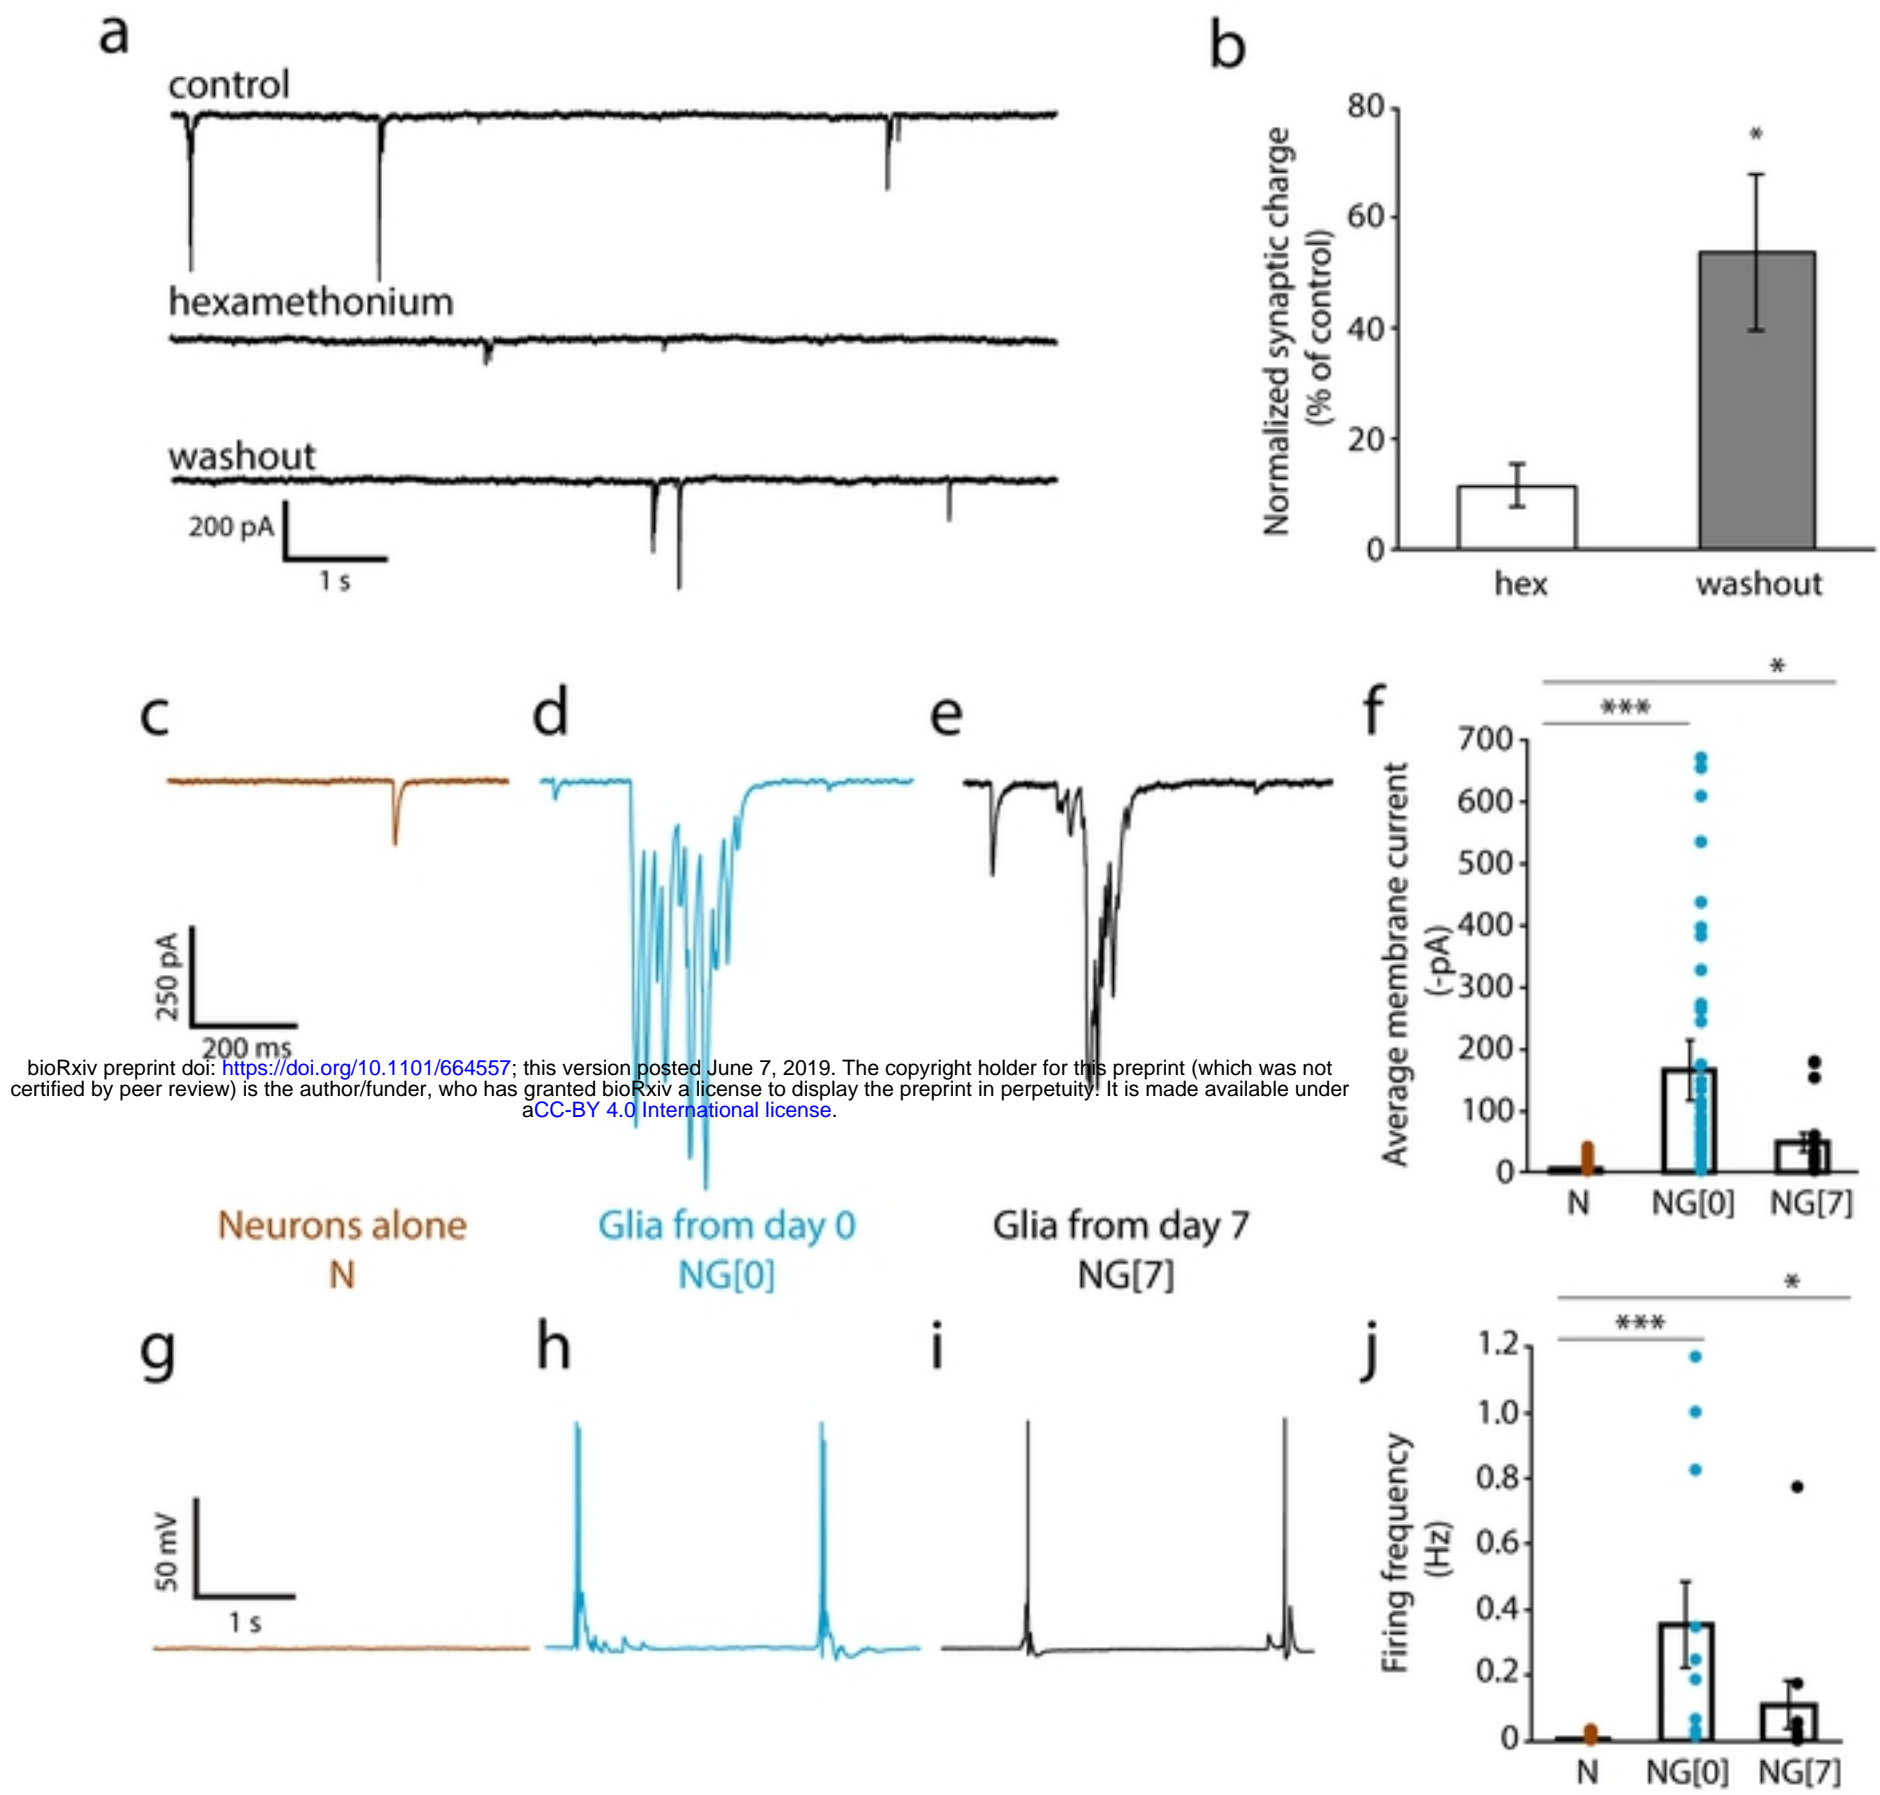

Fig. 5.



bioRxiv preprint doi: <https://doi.org/10.1101/664557>; this version posted June 7, 2019. The copyright holder for this preprint (which was not certified by peer review) is the author/funder, who has granted bioRxiv a license to display the preprint in perpetuity. It is made available under aCC-BY 4.0 International license.

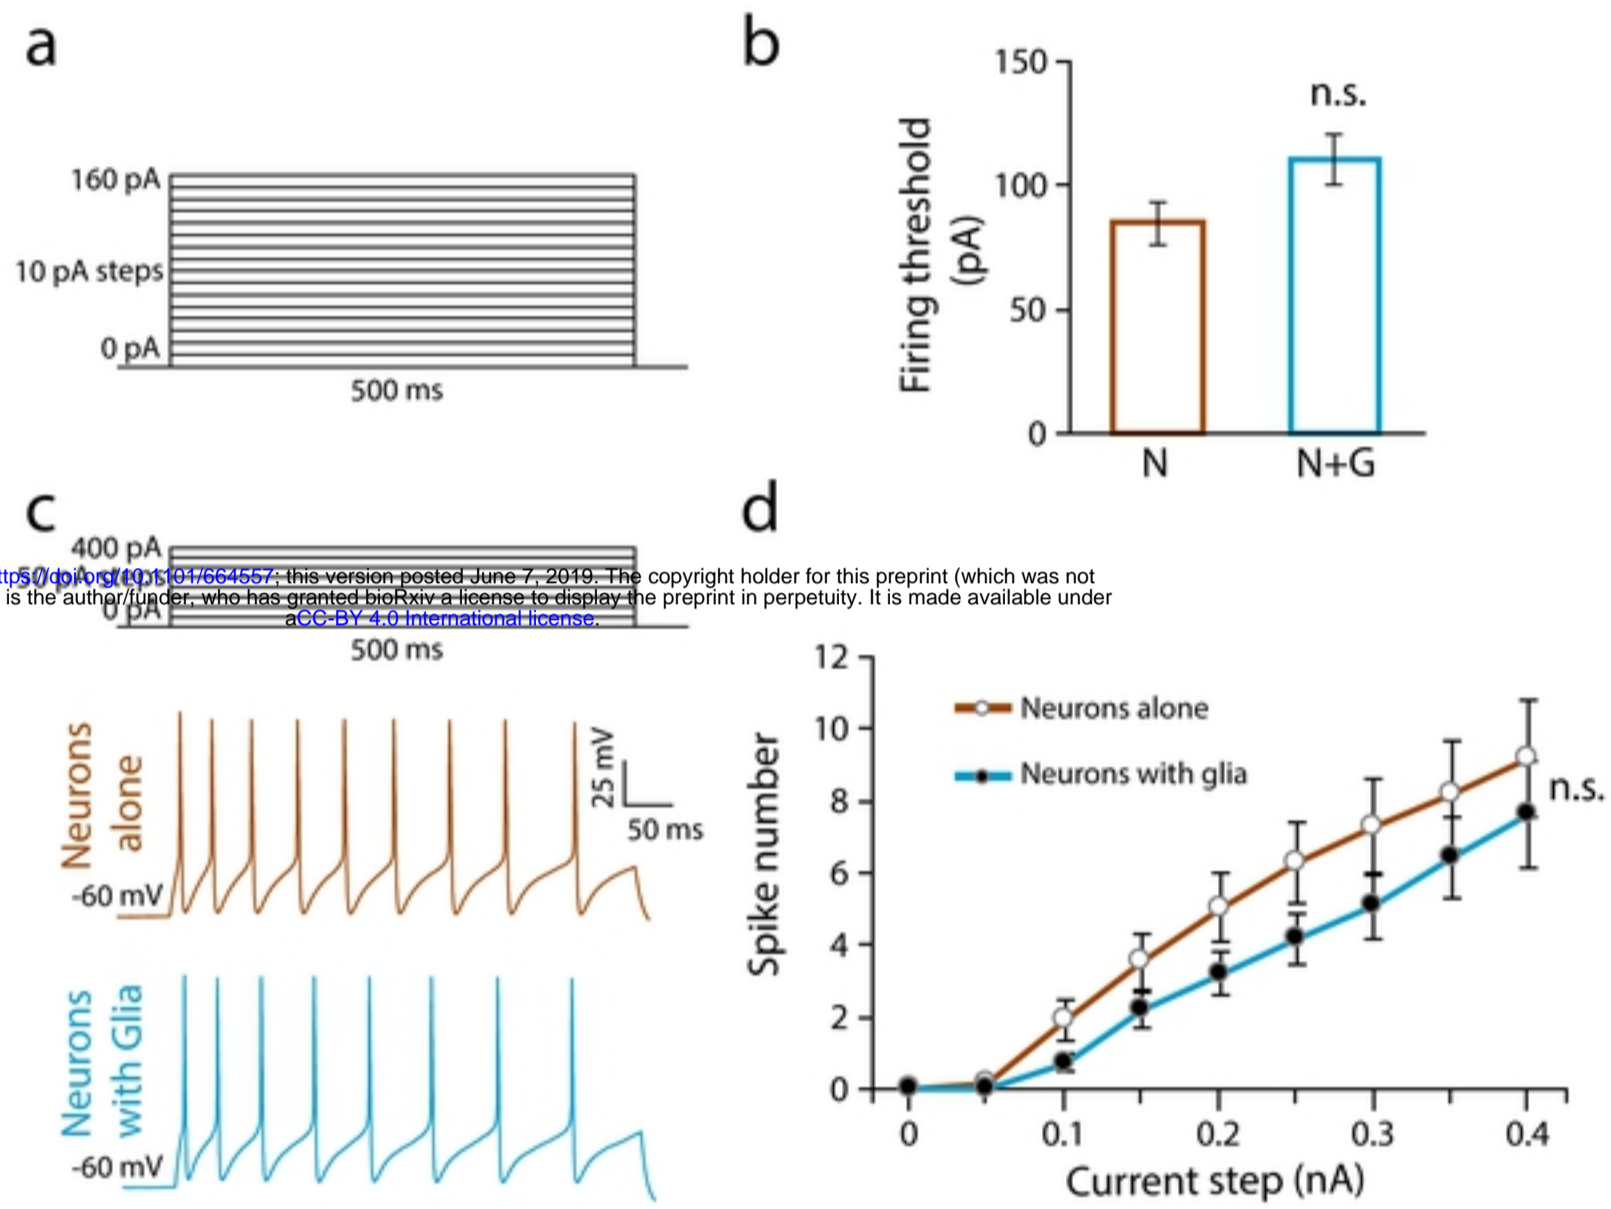

Fig. 6.

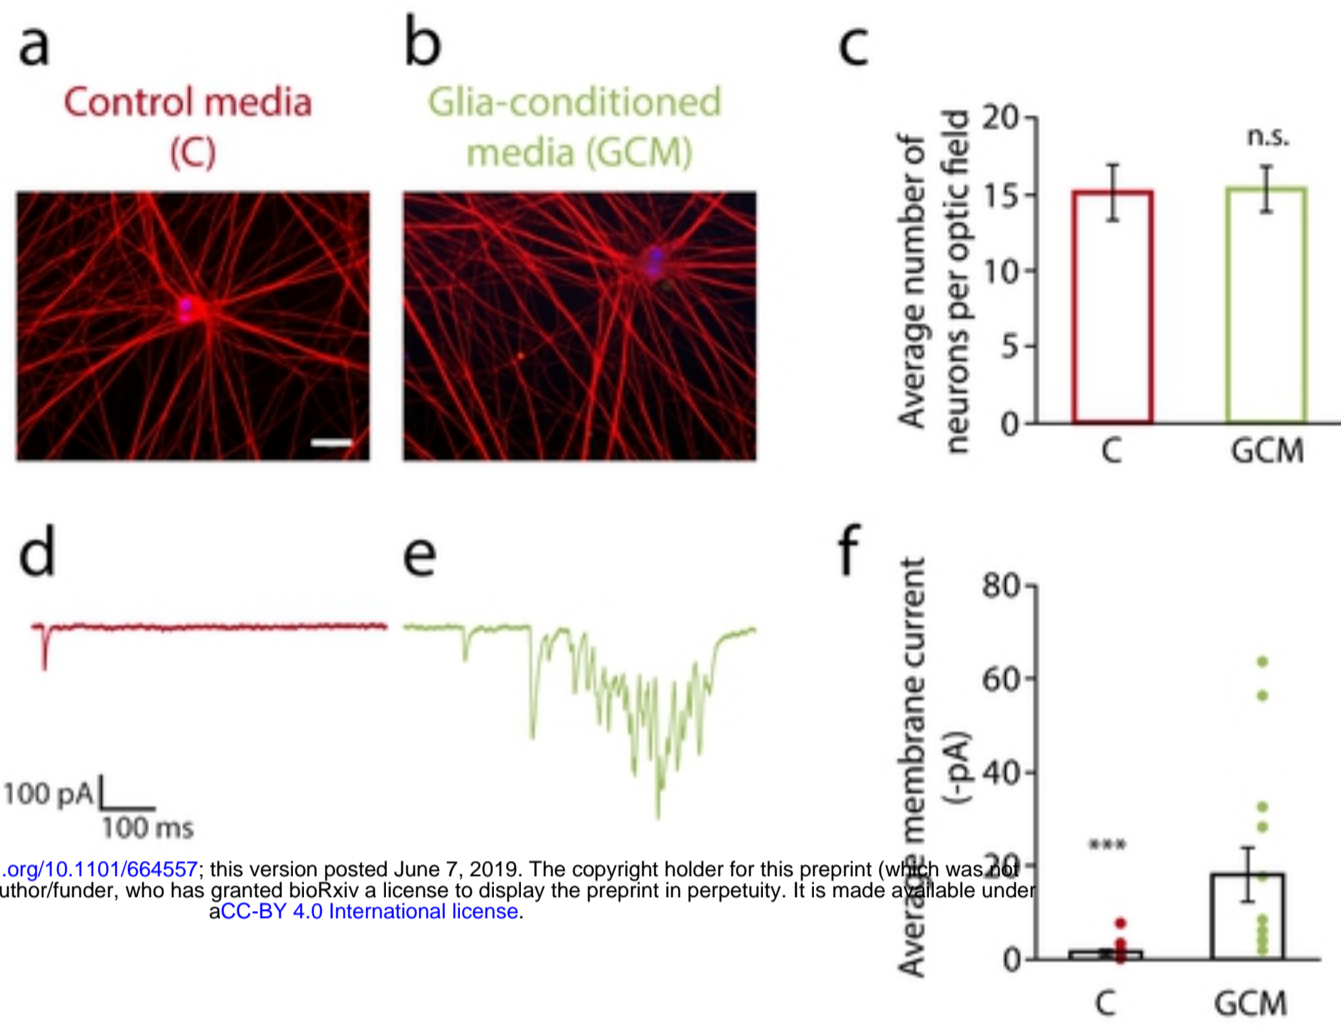

bioRxiv preprint doi: <https://doi.org/10.1101/664557>; this version posted June 7, 2019. The copyright holder for this preprint (which was not certified by peer review) is the author/funder, who has granted bioRxiv a license to display the preprint in perpetuity. It is made available under aCC-BY 4.0 International license.

Fig. 7.

bioRxiv preprint doi: <https://doi.org/10.1101/664957>; this version posted September 19, 2020. The copyright holder for this preprint (which was not certified by peer review) is the author/funder, who has granted bioRxiv a license to display the preprint in perpetuity. It is made available under aCC-BY 4.0 International license.

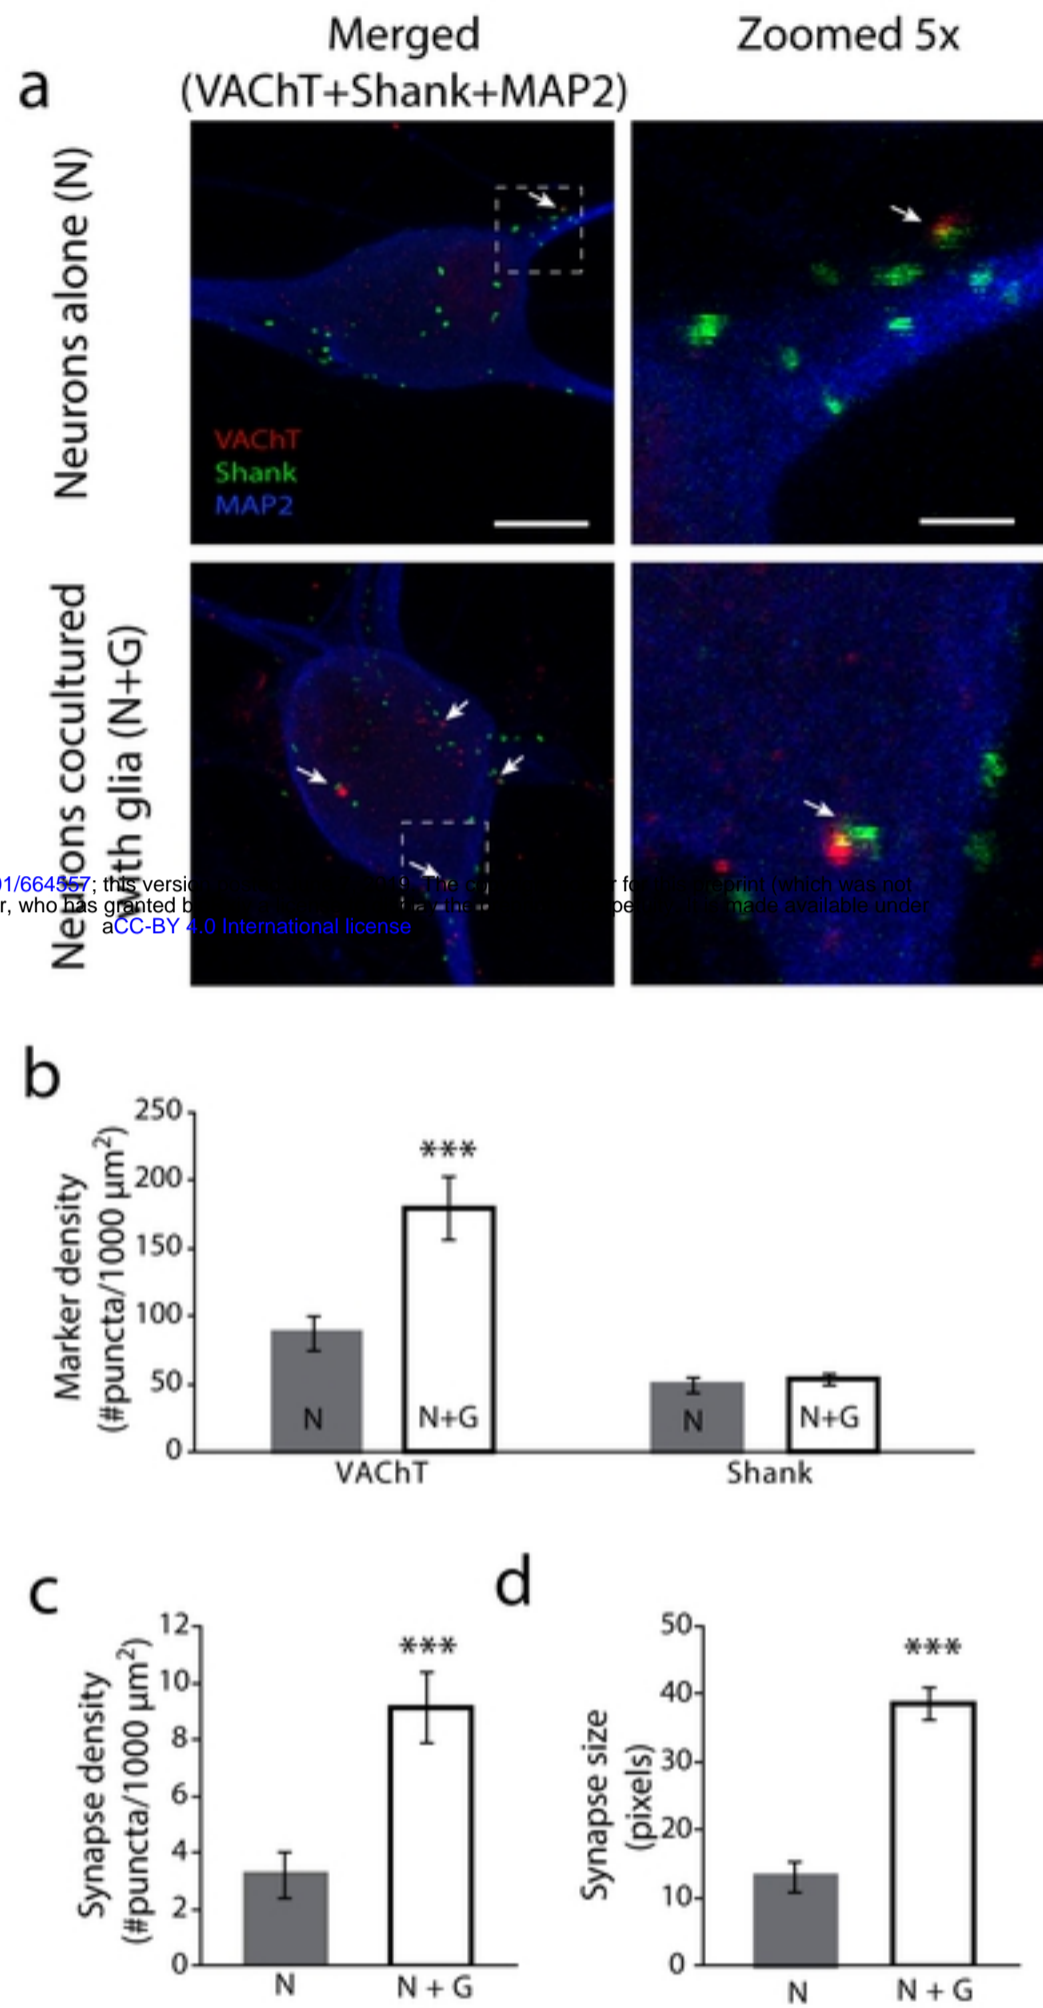

Fig. 8.
